# Supplementary material for: Construction of Bimetallic Co/Fe-Incorporated PTA/FDA Nanoclusters for Boosting Electrocatalytic Oxygen Evolution
Source: Hindawi journal article supplement (doi:10.1155/2023/4991015), 2023-02-04
Supplement: f1 [file 4991015.f1.doc]

**Supplementary information**

### **Construction of Bimetallic Co/Fe-Incorporated PTA/FDA Nanosheets for Boosting Electrocatalytic Oxygen Evolution**

Yuping Gai a, Junbo Hu a, Wei Deng a,*, Wenshuo Xie a, Xiang Li a, Jingjing Zhang a, Dewu Long b, Shanlin Qiao c, Fei Jiang a,*

*a School of Chemical and Environmental Engineering, Shanghai Institute of Technoloy, Shanghai, 201418, China*

*b Key Laboratory in Interfacial Physics and Technology, Shanghai Institute of Applied Physics, Chinese Academy of Sciences, Shanghai, 201800, China*

*c College of Chemistry and Pharmaceutical Engineering, Hebei University of Science and Technology, Shijiazhuang 050018, China*

**Characterization**

SEM images were obtained through a Quanta 400 FEG scanning electron microscope performed at 20 kV. Transmission electron microscopy (TEM) and elemental mapping images were collected from a Talos F200X TEM with acceleration voltages of 200 or 800 kV. AFM was measured by using Nano Man VS Scope III (Digital Instrument) in the tapping mode. X-ray diffraction (XRD) data were recorded from a Rigaku Ultimate IV X-ray diffractometer equipped with graphite monochromatized Cu K radiation (λ= 1.5418 Å) at 30 kV and 10mA, with 2θ ranging between 10° and 70° at a scanning rate of 4°/min. X-ray photoelectron spectra (XPS) were executed on a A thermo ESCALAB 250XI XPS instrument by non-monochromatized Al-Kα X-ray as the excitation source. In additon, the bingding energy was range from 0 eV to 1000 eV.

**The DFT calculation:**

All computational process were conducted by using the CASTEP program package embedded in Materials Studio of Accelrys Inc.The generalized gradient approximation (GGA) exchange correlation functional and the Perdew-Burke-Ernzerhof (PBE) functional were used to delineate the electron-electron interaction. Our DFT calculations provide models for simulating the possible active sites in nanoclusters. The simplification of the whole crystal structure makes it clear to consider the binding sites between the reaction intermediate and the catalytic atom. The free energy results show that the binding energy between the active atom and the intermediate species can be effectively reduced by using a small amount of Fe instead of Co, thus providing a novel idea in order to ameliorate the electrocatalytic activity.

The Volmer reaction (Equation S1)

In the alkaline environment, the whole course on the anode for OER can be expounded by the following four-step binding mechanism (Equation S2-S5)

The Gibbs free energy change for steps 2–5 can be expressed as Equation S6-S9

Where U is the applied voltage, in this study, U=0, in order to avoid the difficulty of calculating O2 bond energy in GGA-DFT the total free energy (△g) of O2 molecule is fixed at 4.92 eV. Using the zero point energy and entropy correction method, the Gibbs free energy of the intermediate products adsorbed on the catalyst surface were calculated using Equation S10.

Where ΔZPE, T and ΔS are the contributions to the free energy from the zero-point vibration energy, temperature and entropy, respectively. The zero-point energies are calculated from the vibration frequencies. The values of ΔZPE were determined by the calculated vibrational frequencies and the –eU term represents the external by U imposed on each step. The entropies are taken from standard tables for molecules. Gas phase H2O at 0.035 bar is used as the reference state because at this pressure gas phase H2O is in equilibrium with liquid water at 298 K. The theoretical reaction overpotential η can be obtained evaluating the difference between the minimum voltage needed for the OER and the corresponding voltage needed for changing all the free-energy steps into downhill.

The adsorbed intermediate diversification of free energy ∆Eads can bedescribed by Equation S11-13.

In the formula, E(*), E(OH*), E(O*) and E(OOH*) are severally the total energy of the clean surface and adsorbed surface containing the three kind of intermediate products. E (H2), E(O2) and E (H2O) are severally the calculated energies of the unique H2, O2 and H2O molecules.

The theoretical overpotential η can then be defined as Equation S14.


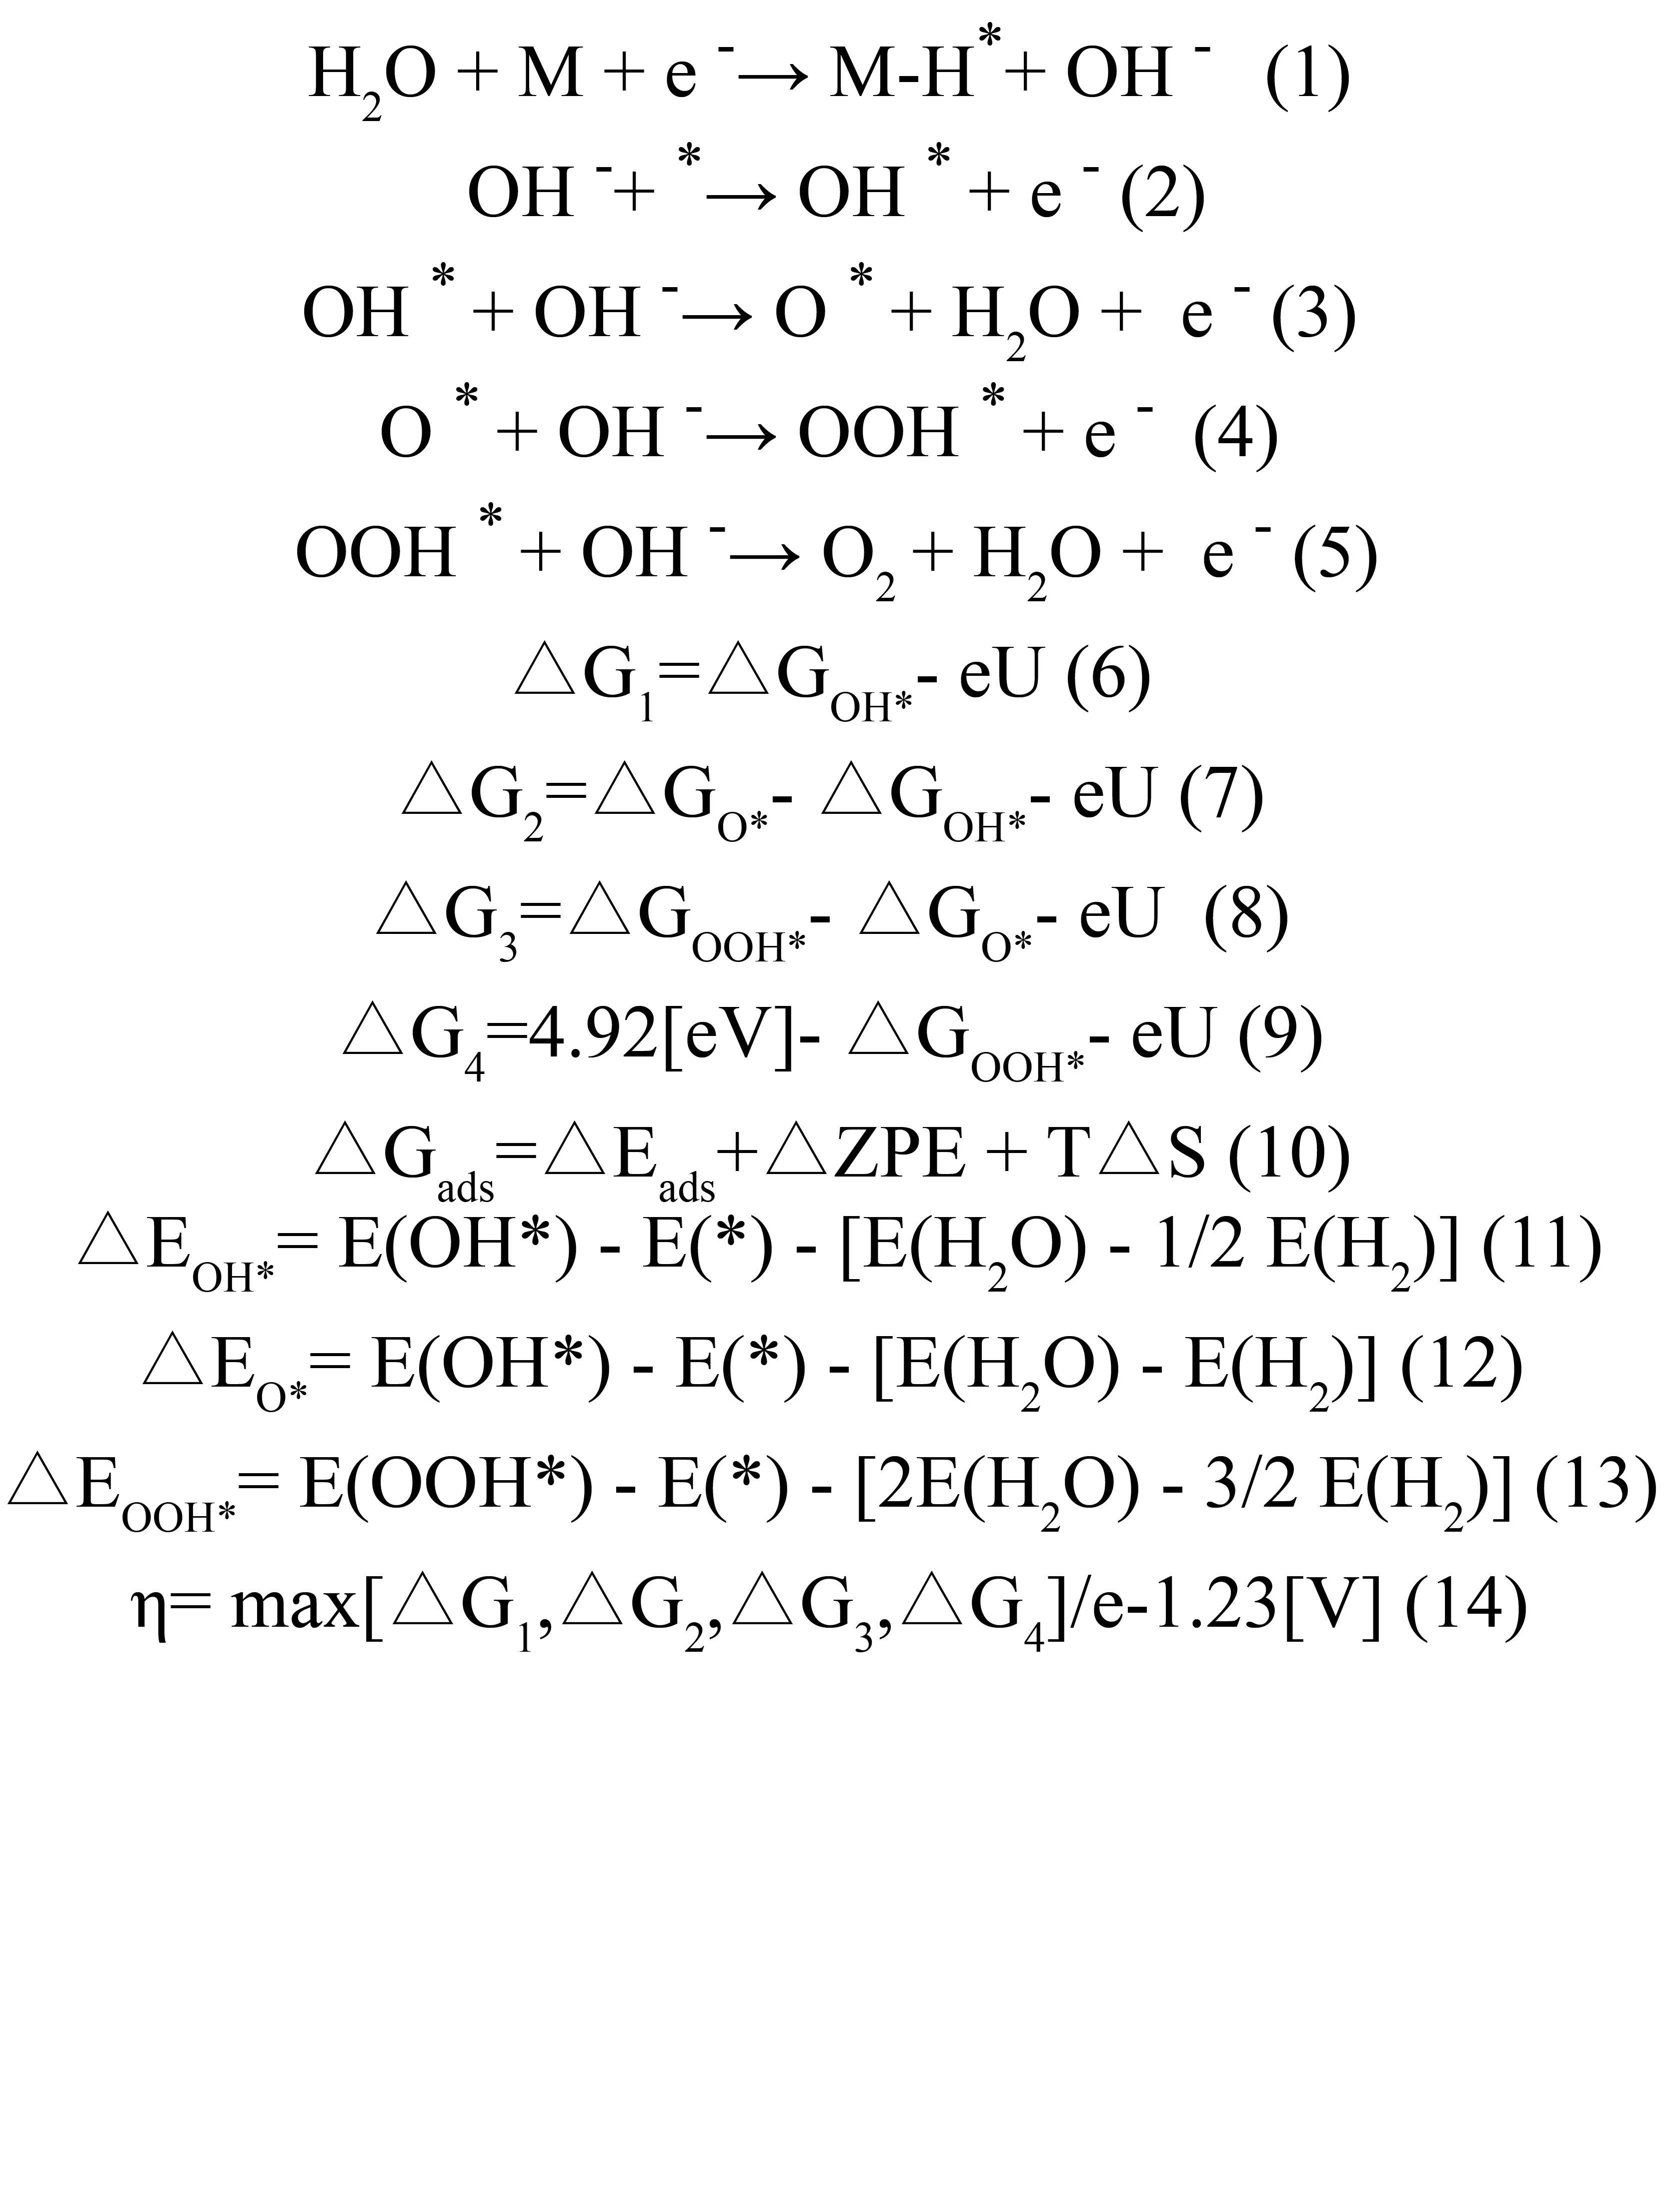


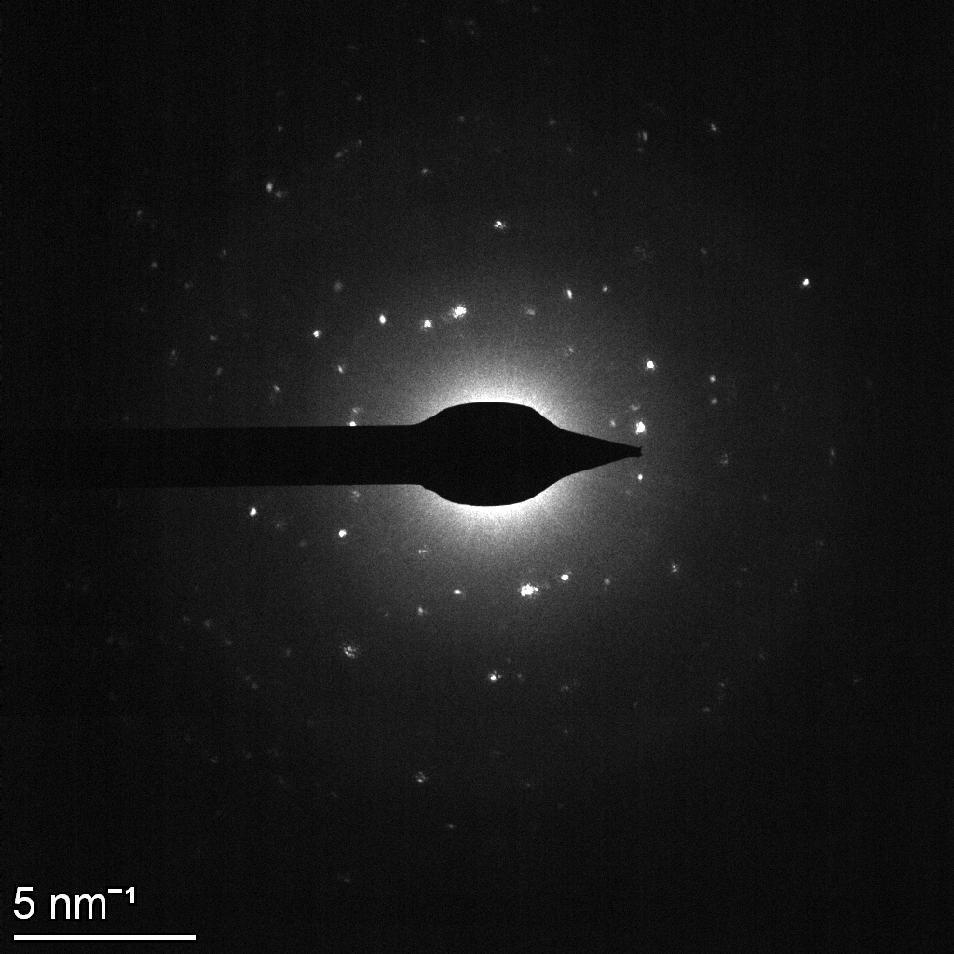


**FIGURE S1** SAED images of CoFe-PTA/FDA.


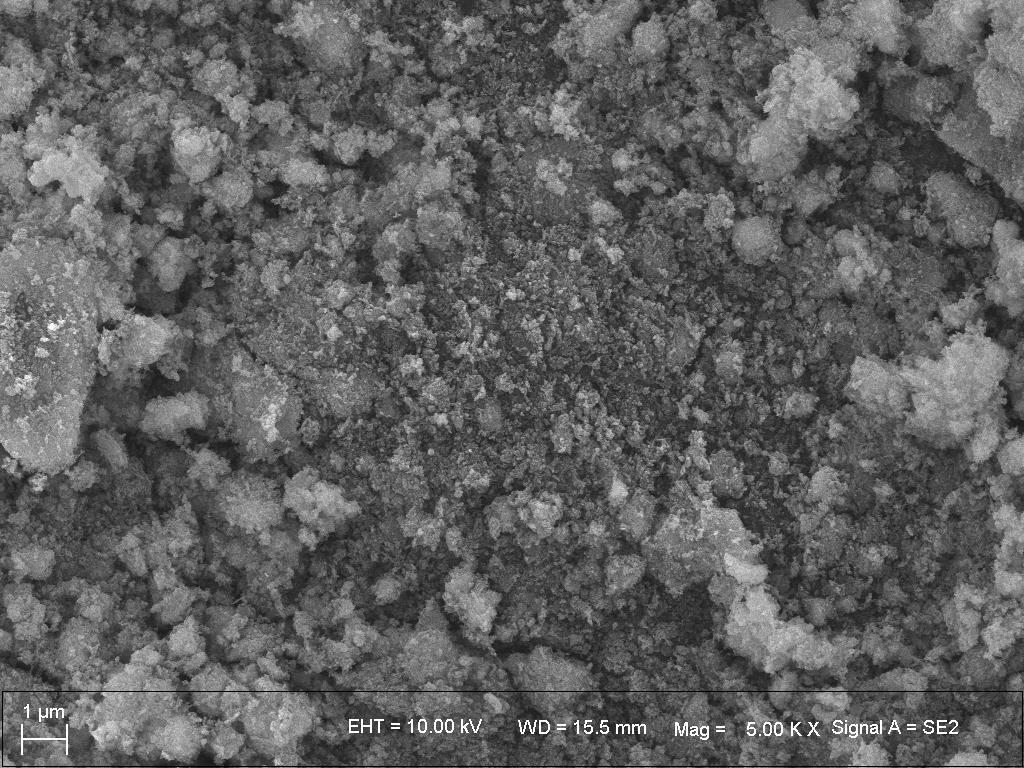


**FIGURE S2** SEM images of CoFe-PTA/FDA on other scales.


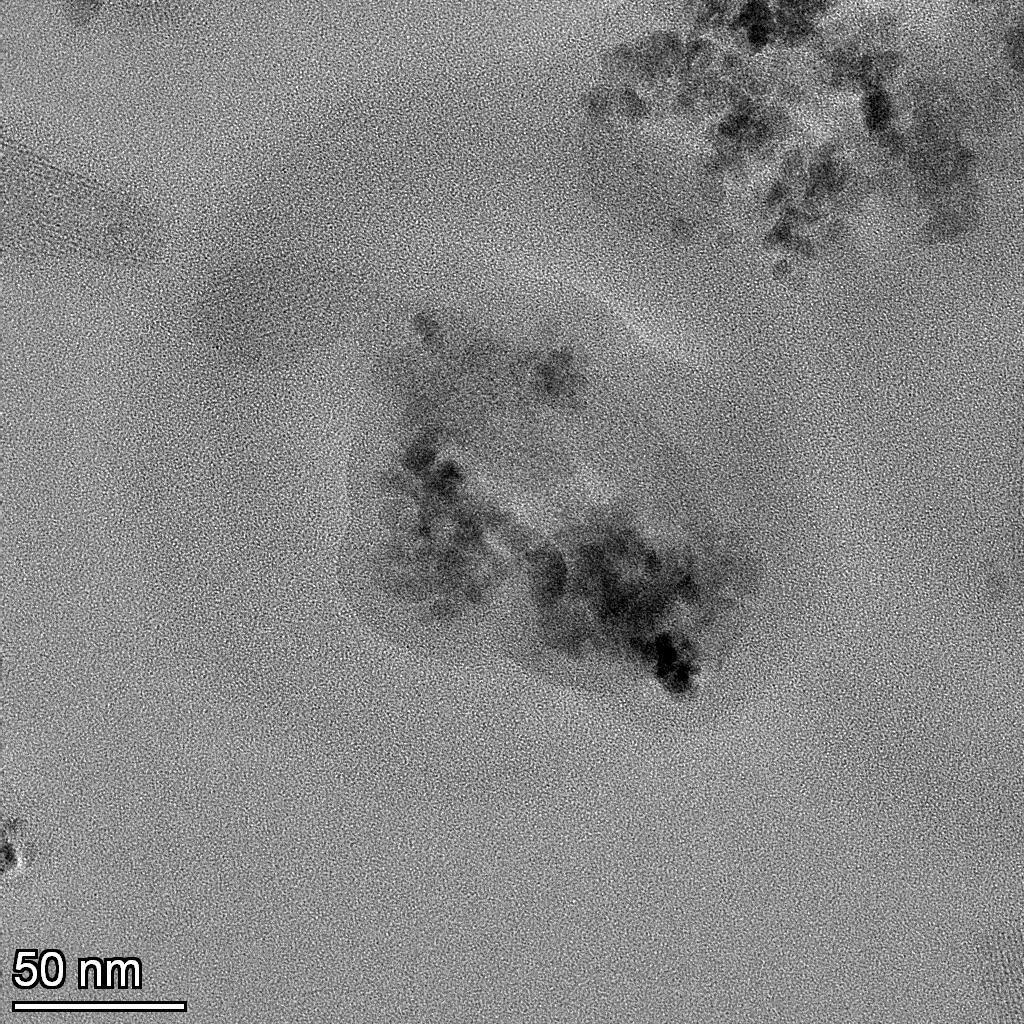


**FIGURE S3** TEM images of CoFe-PTA/FDA on other scales.


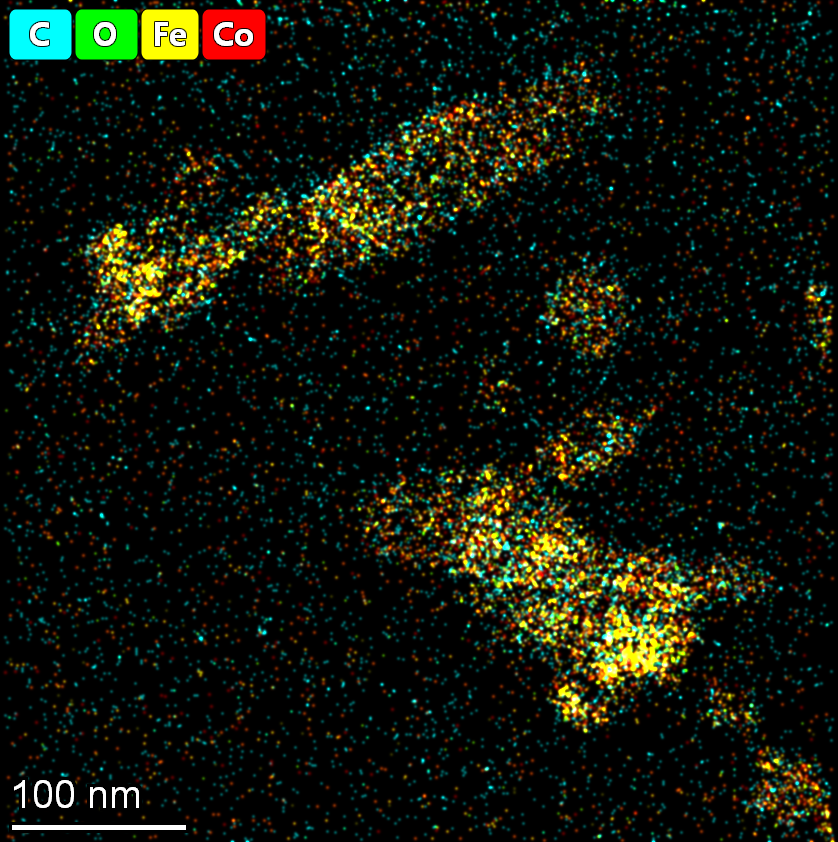


**FIGURE S4** EDS elemental mapping of C, Fe, Co, O elements of CoFe-PTA/FDA.


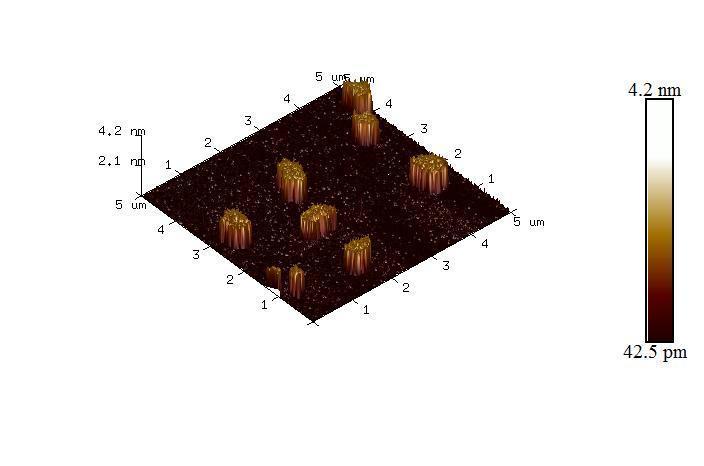


**FIGURE S5** 3D atomic force microscopy image of CoFe-PTA/FDA.


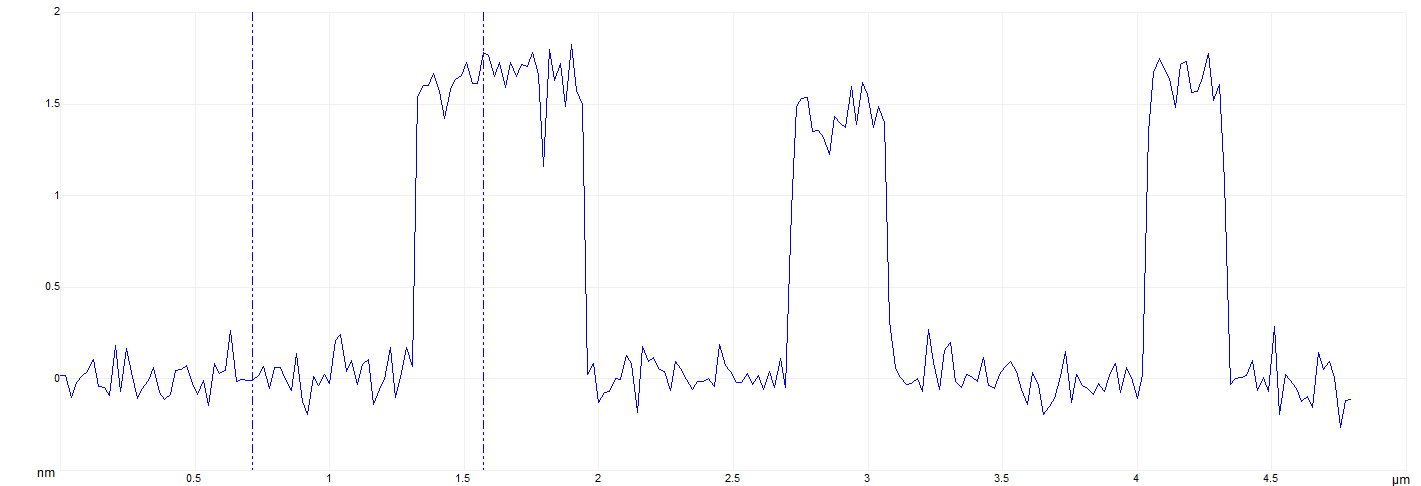


**FIGURE S6** The height profiles corresponding atomic force microscopy image.


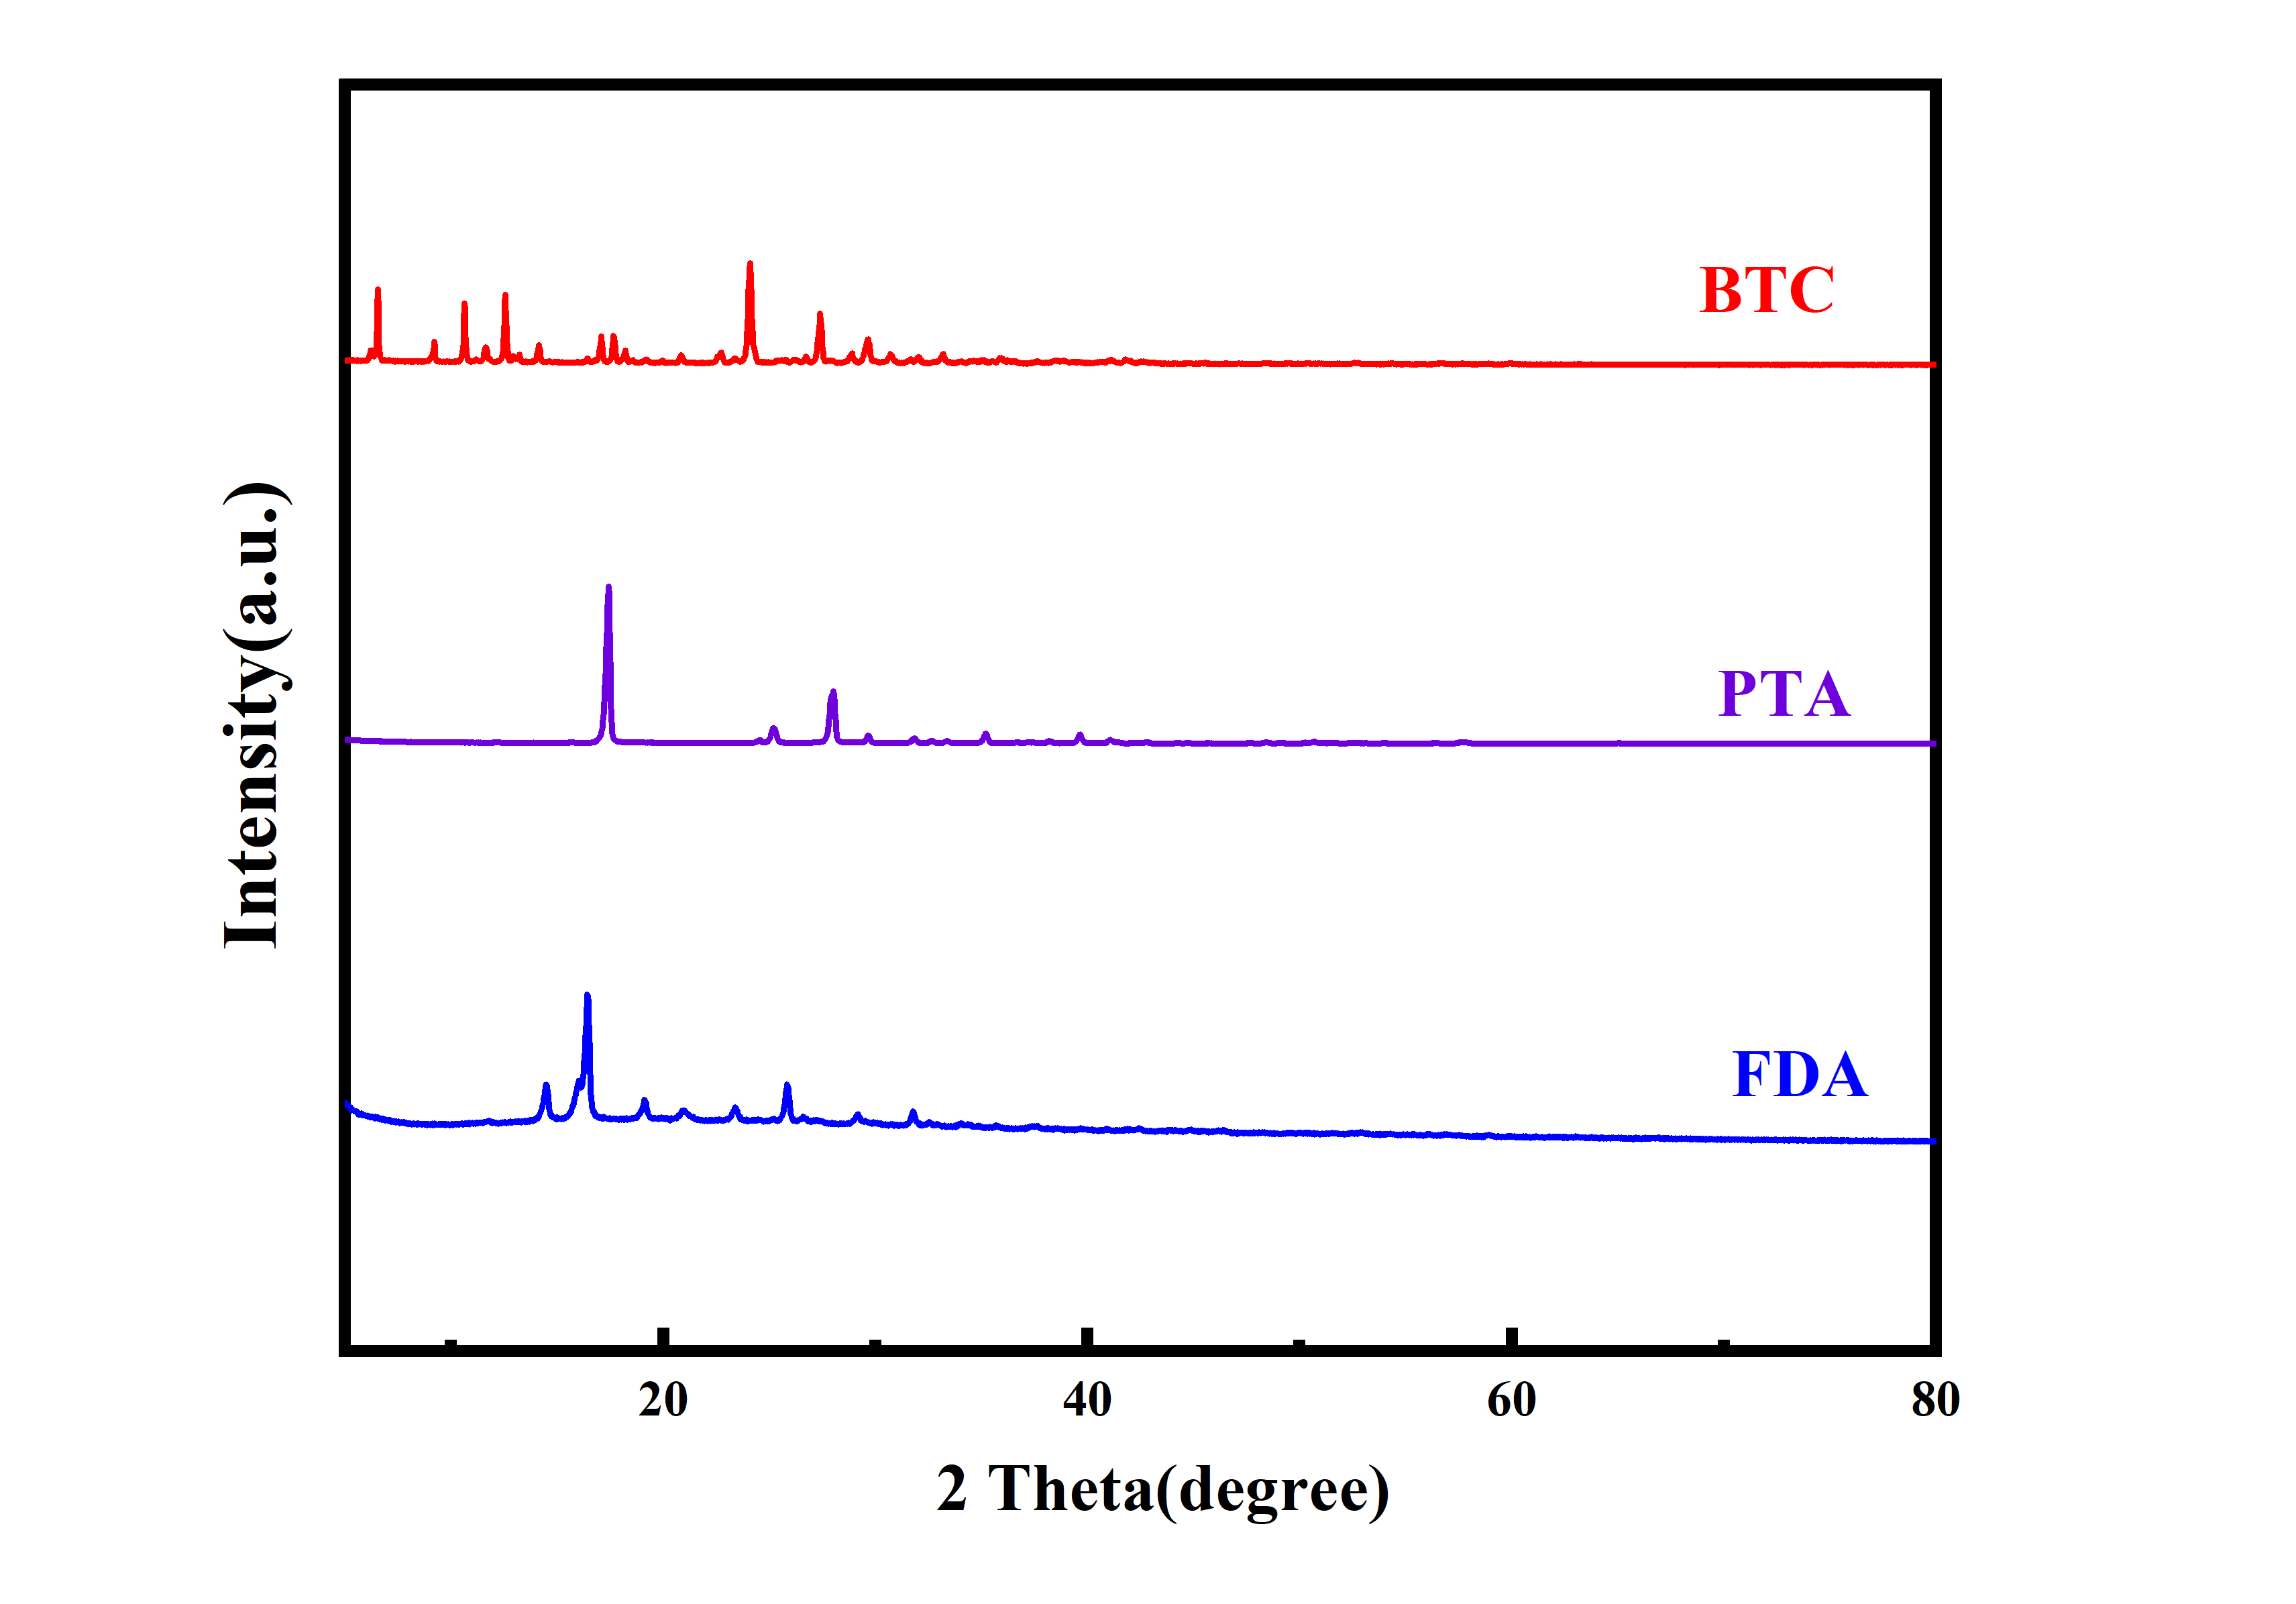
 **
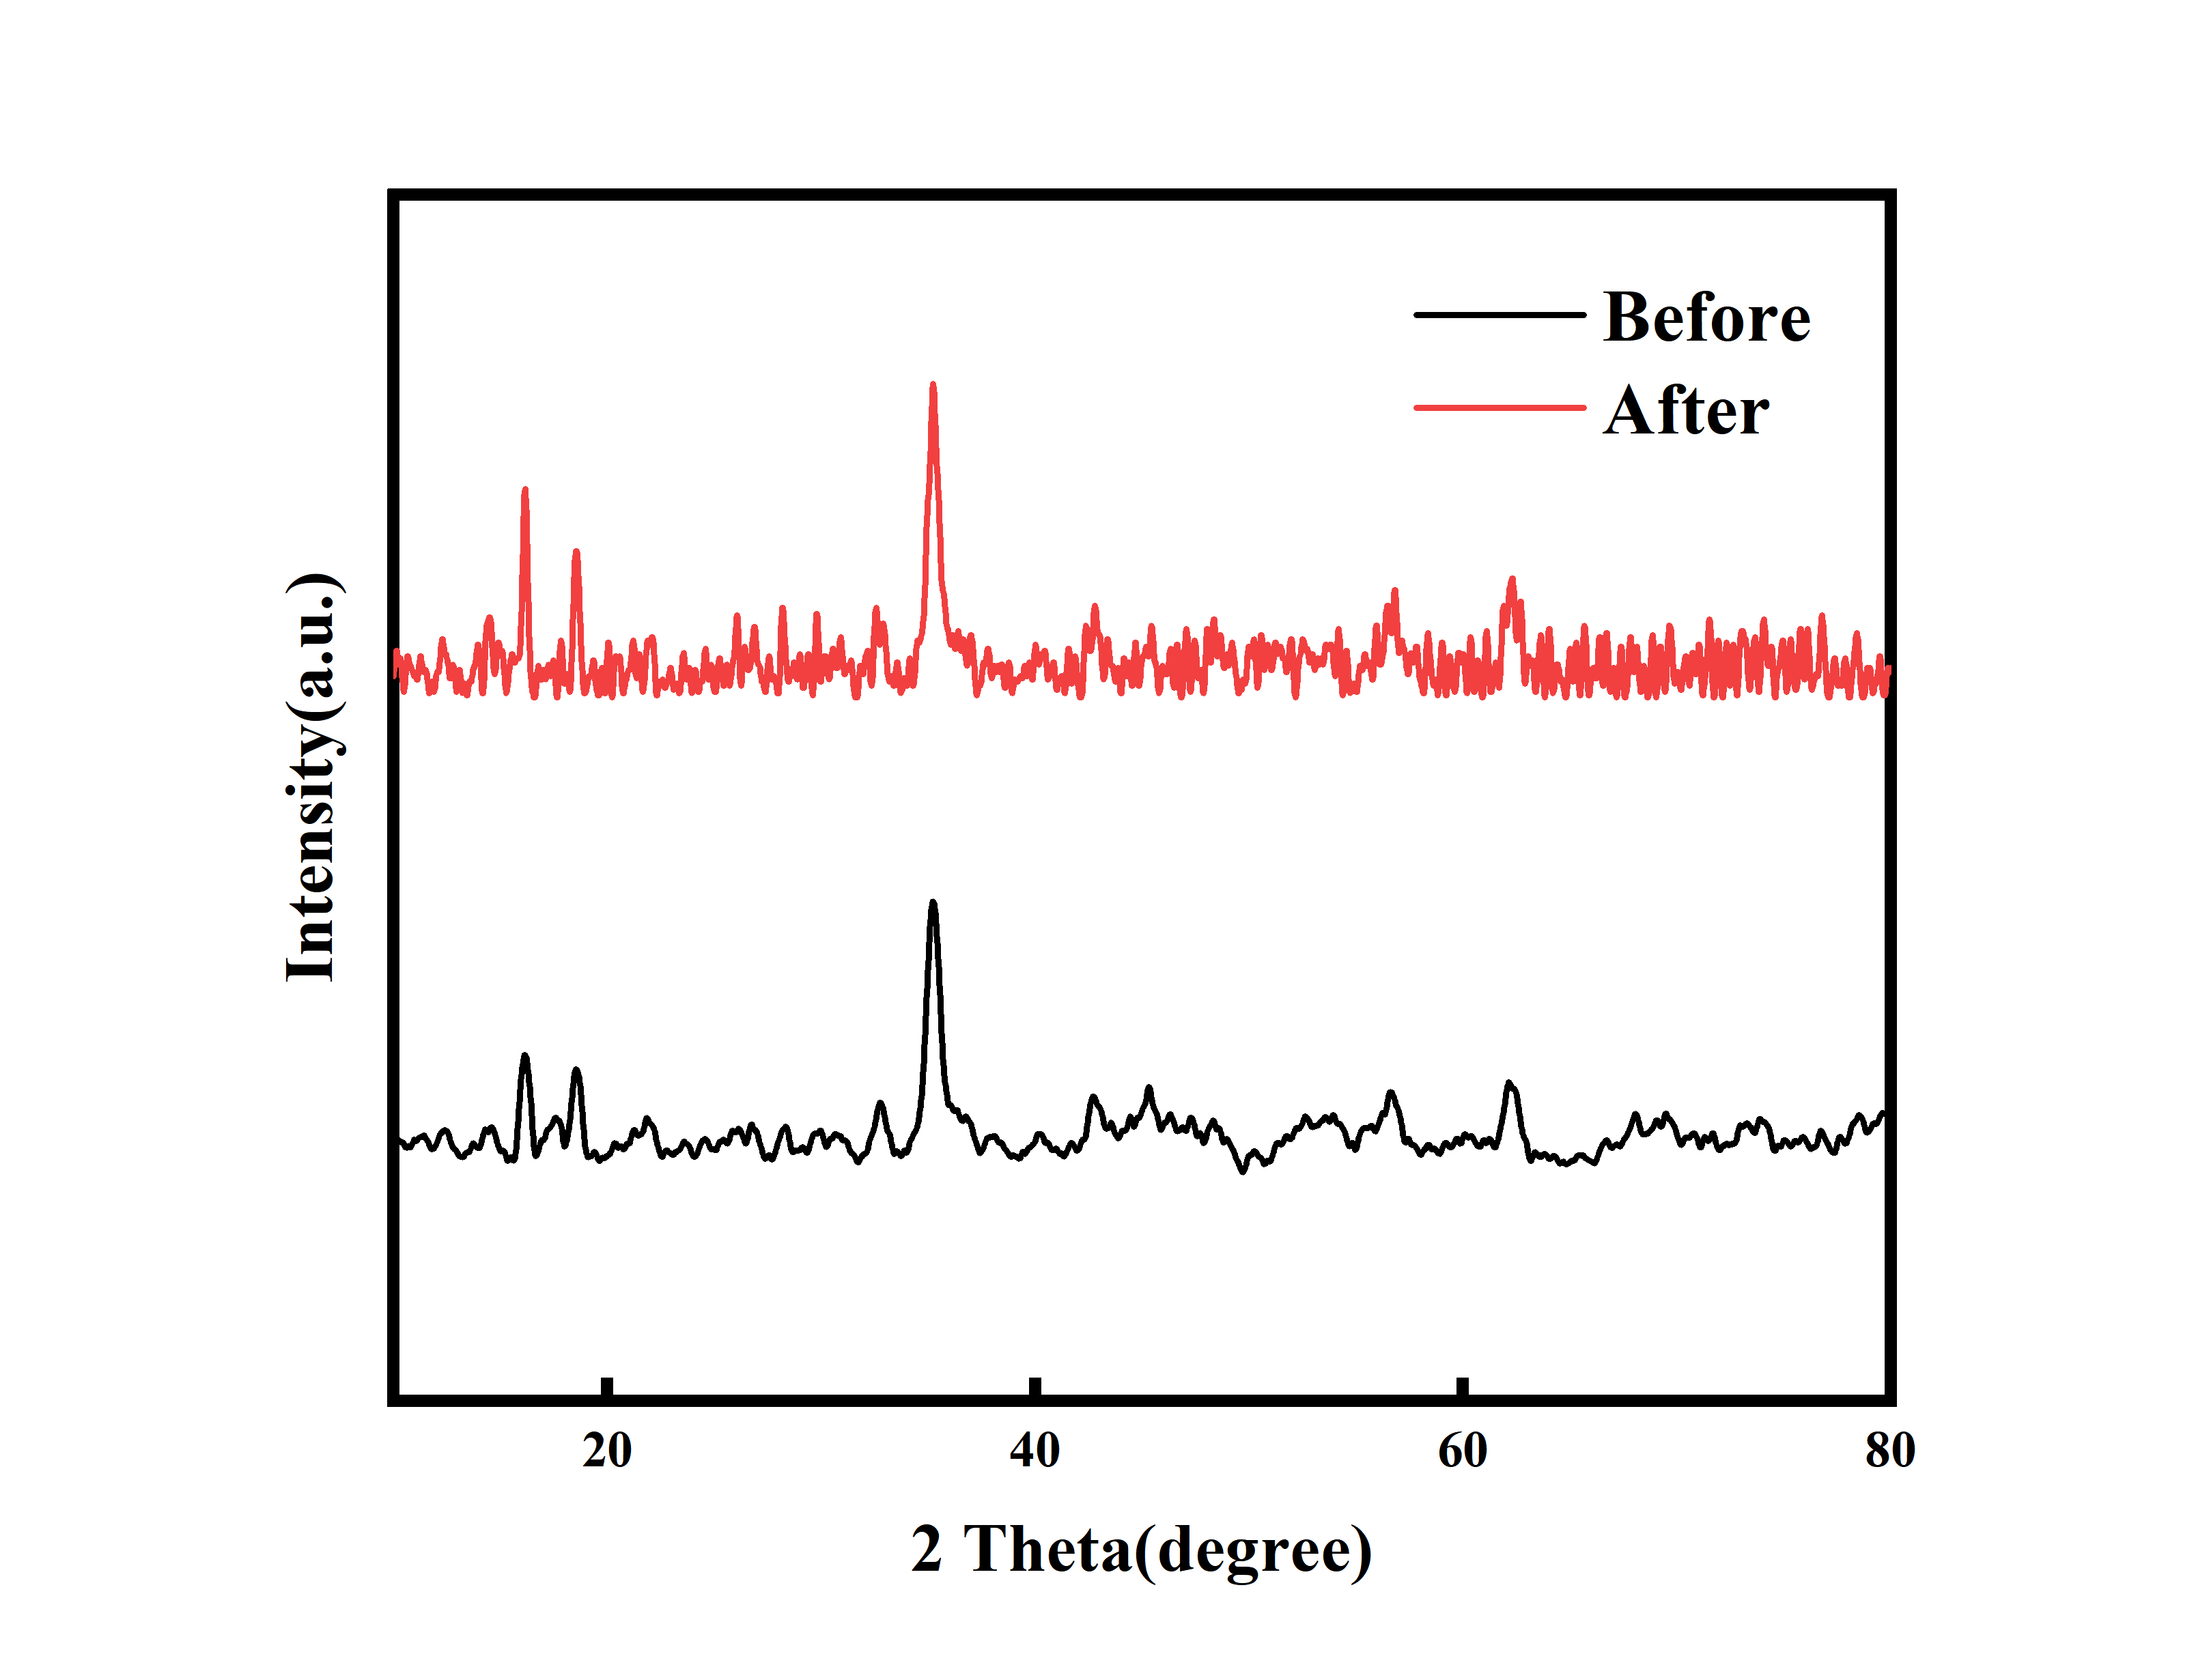
**

1. **（b）**

**FIGURE S7**（a）XRD image of BTC, PTA and FDA. （b）XRD image of CoFe-PTAFDA nanoclusters before and after electrochemical oxidation.

**
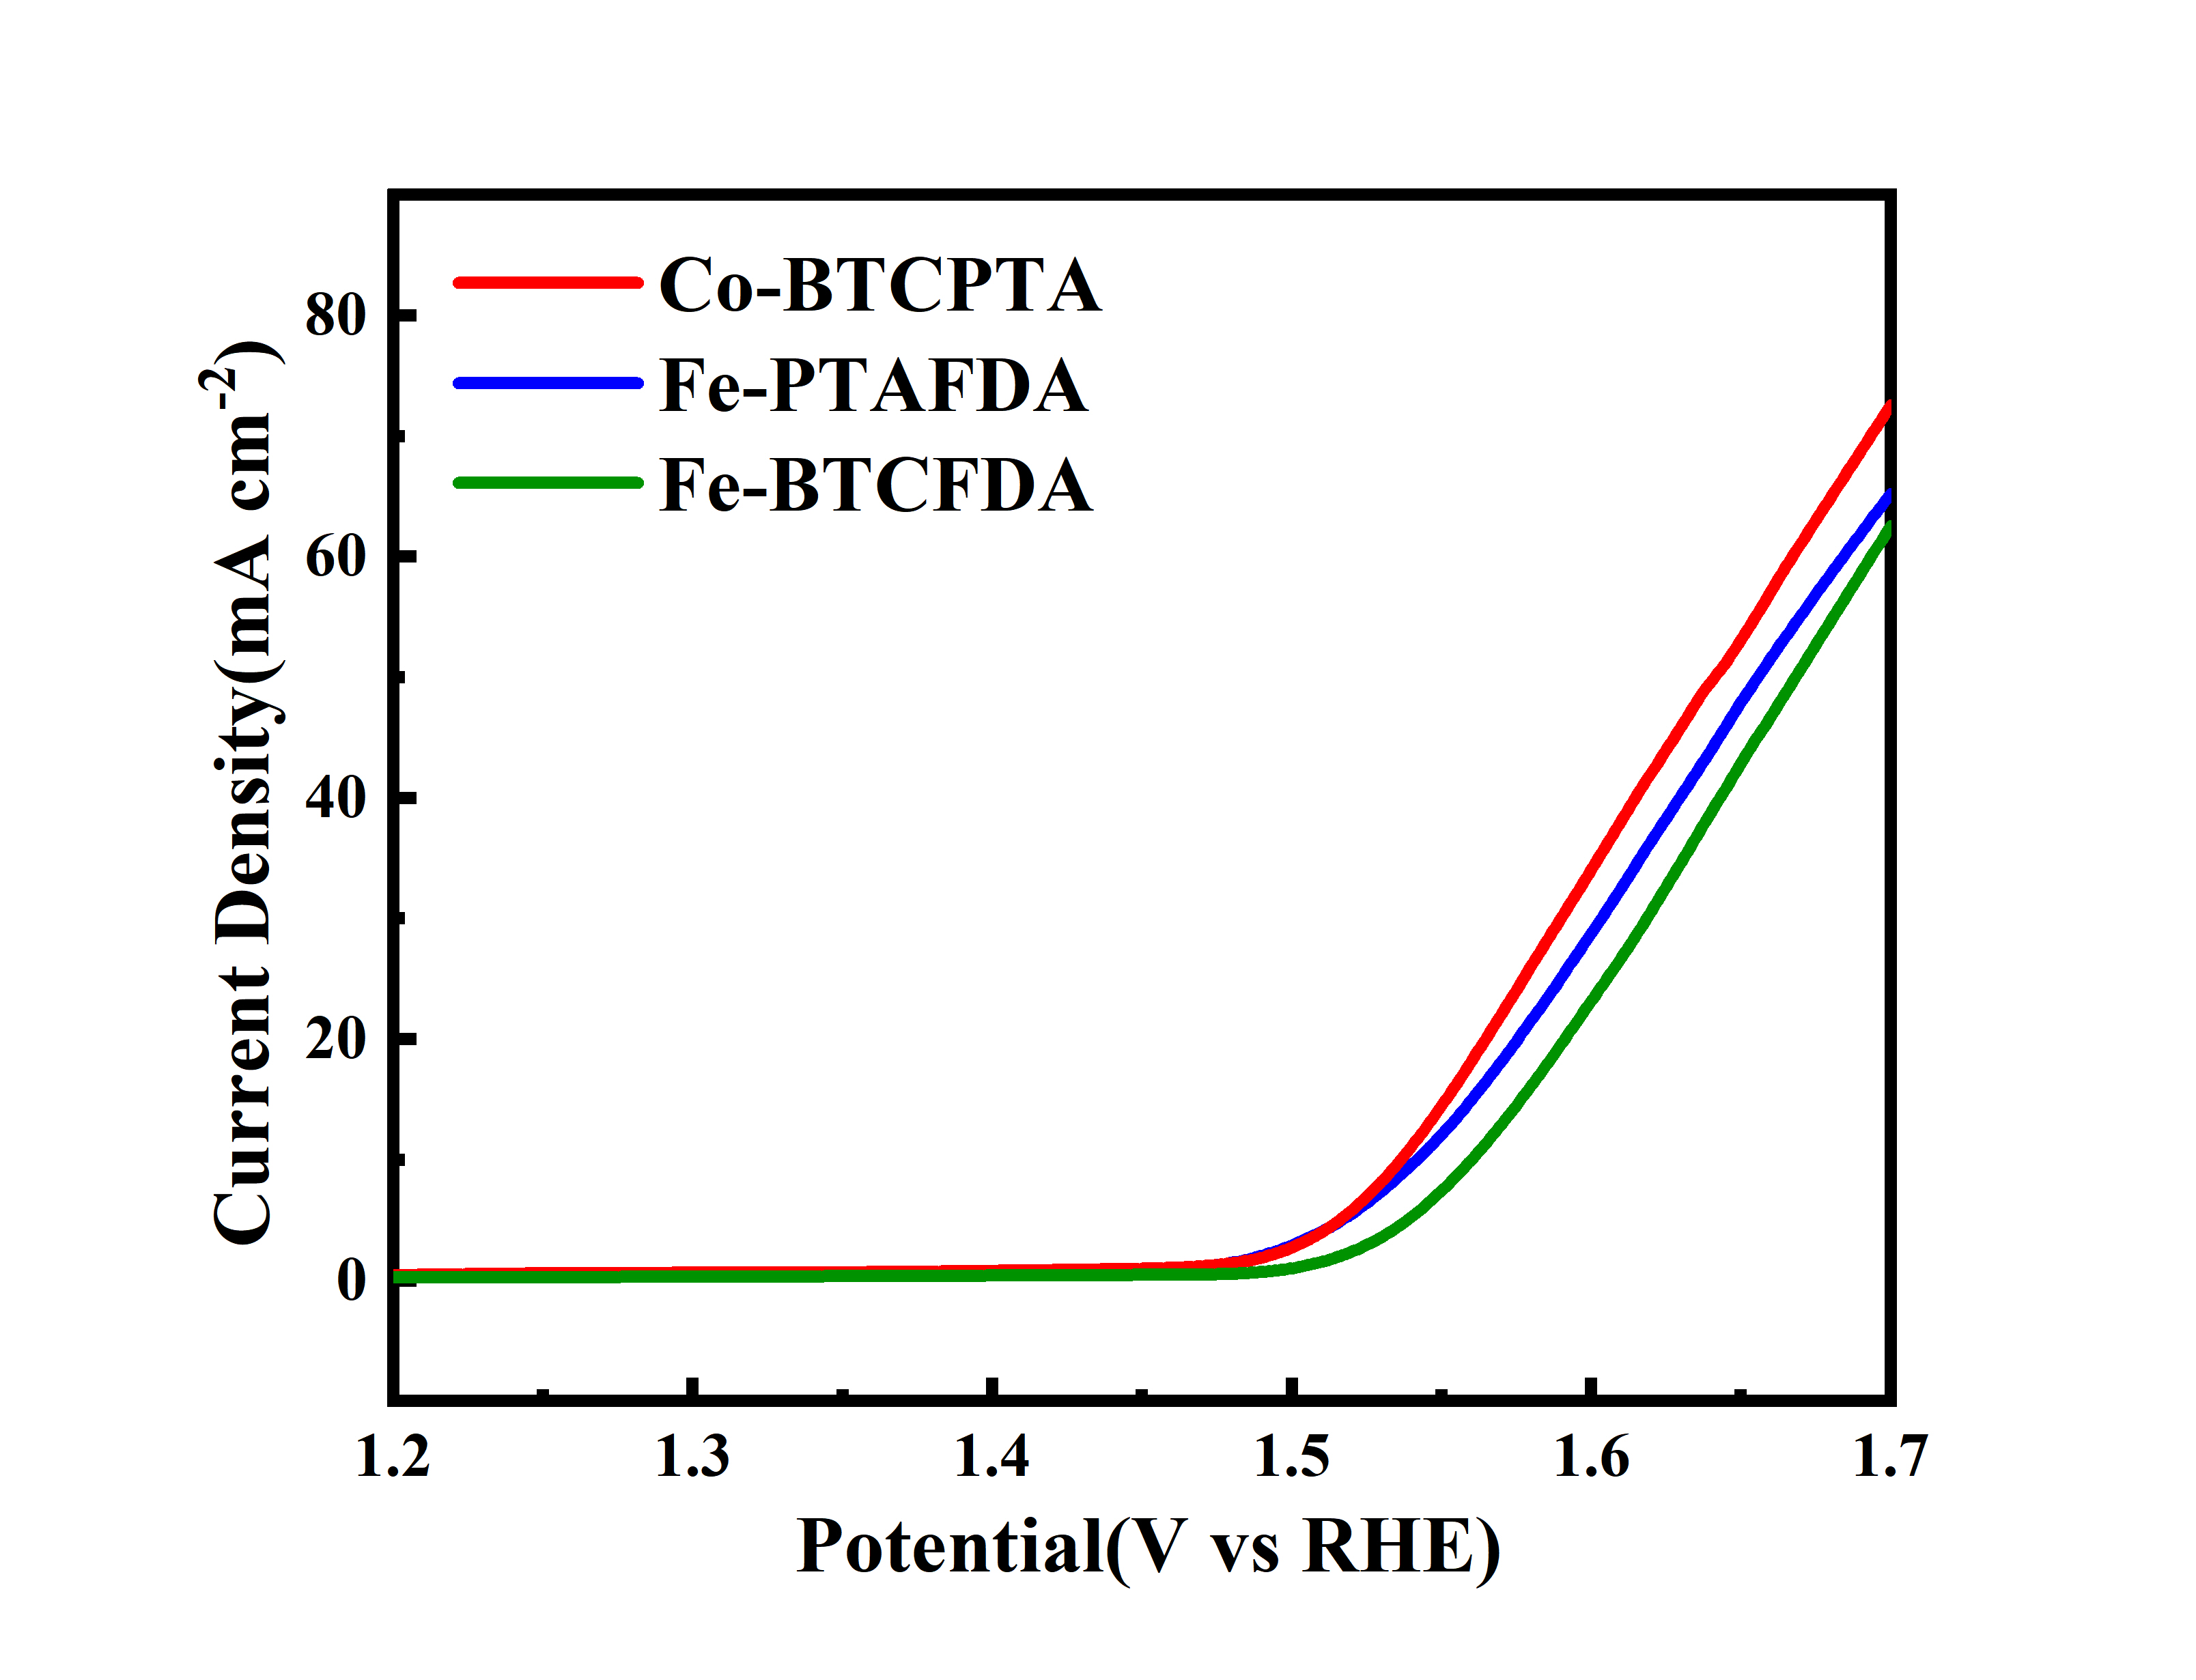
**

**FIGURE S8** OER polarization curves of Fe-PTA/FDA, Co-BTC/PTA, Fe-BTC/FDA.


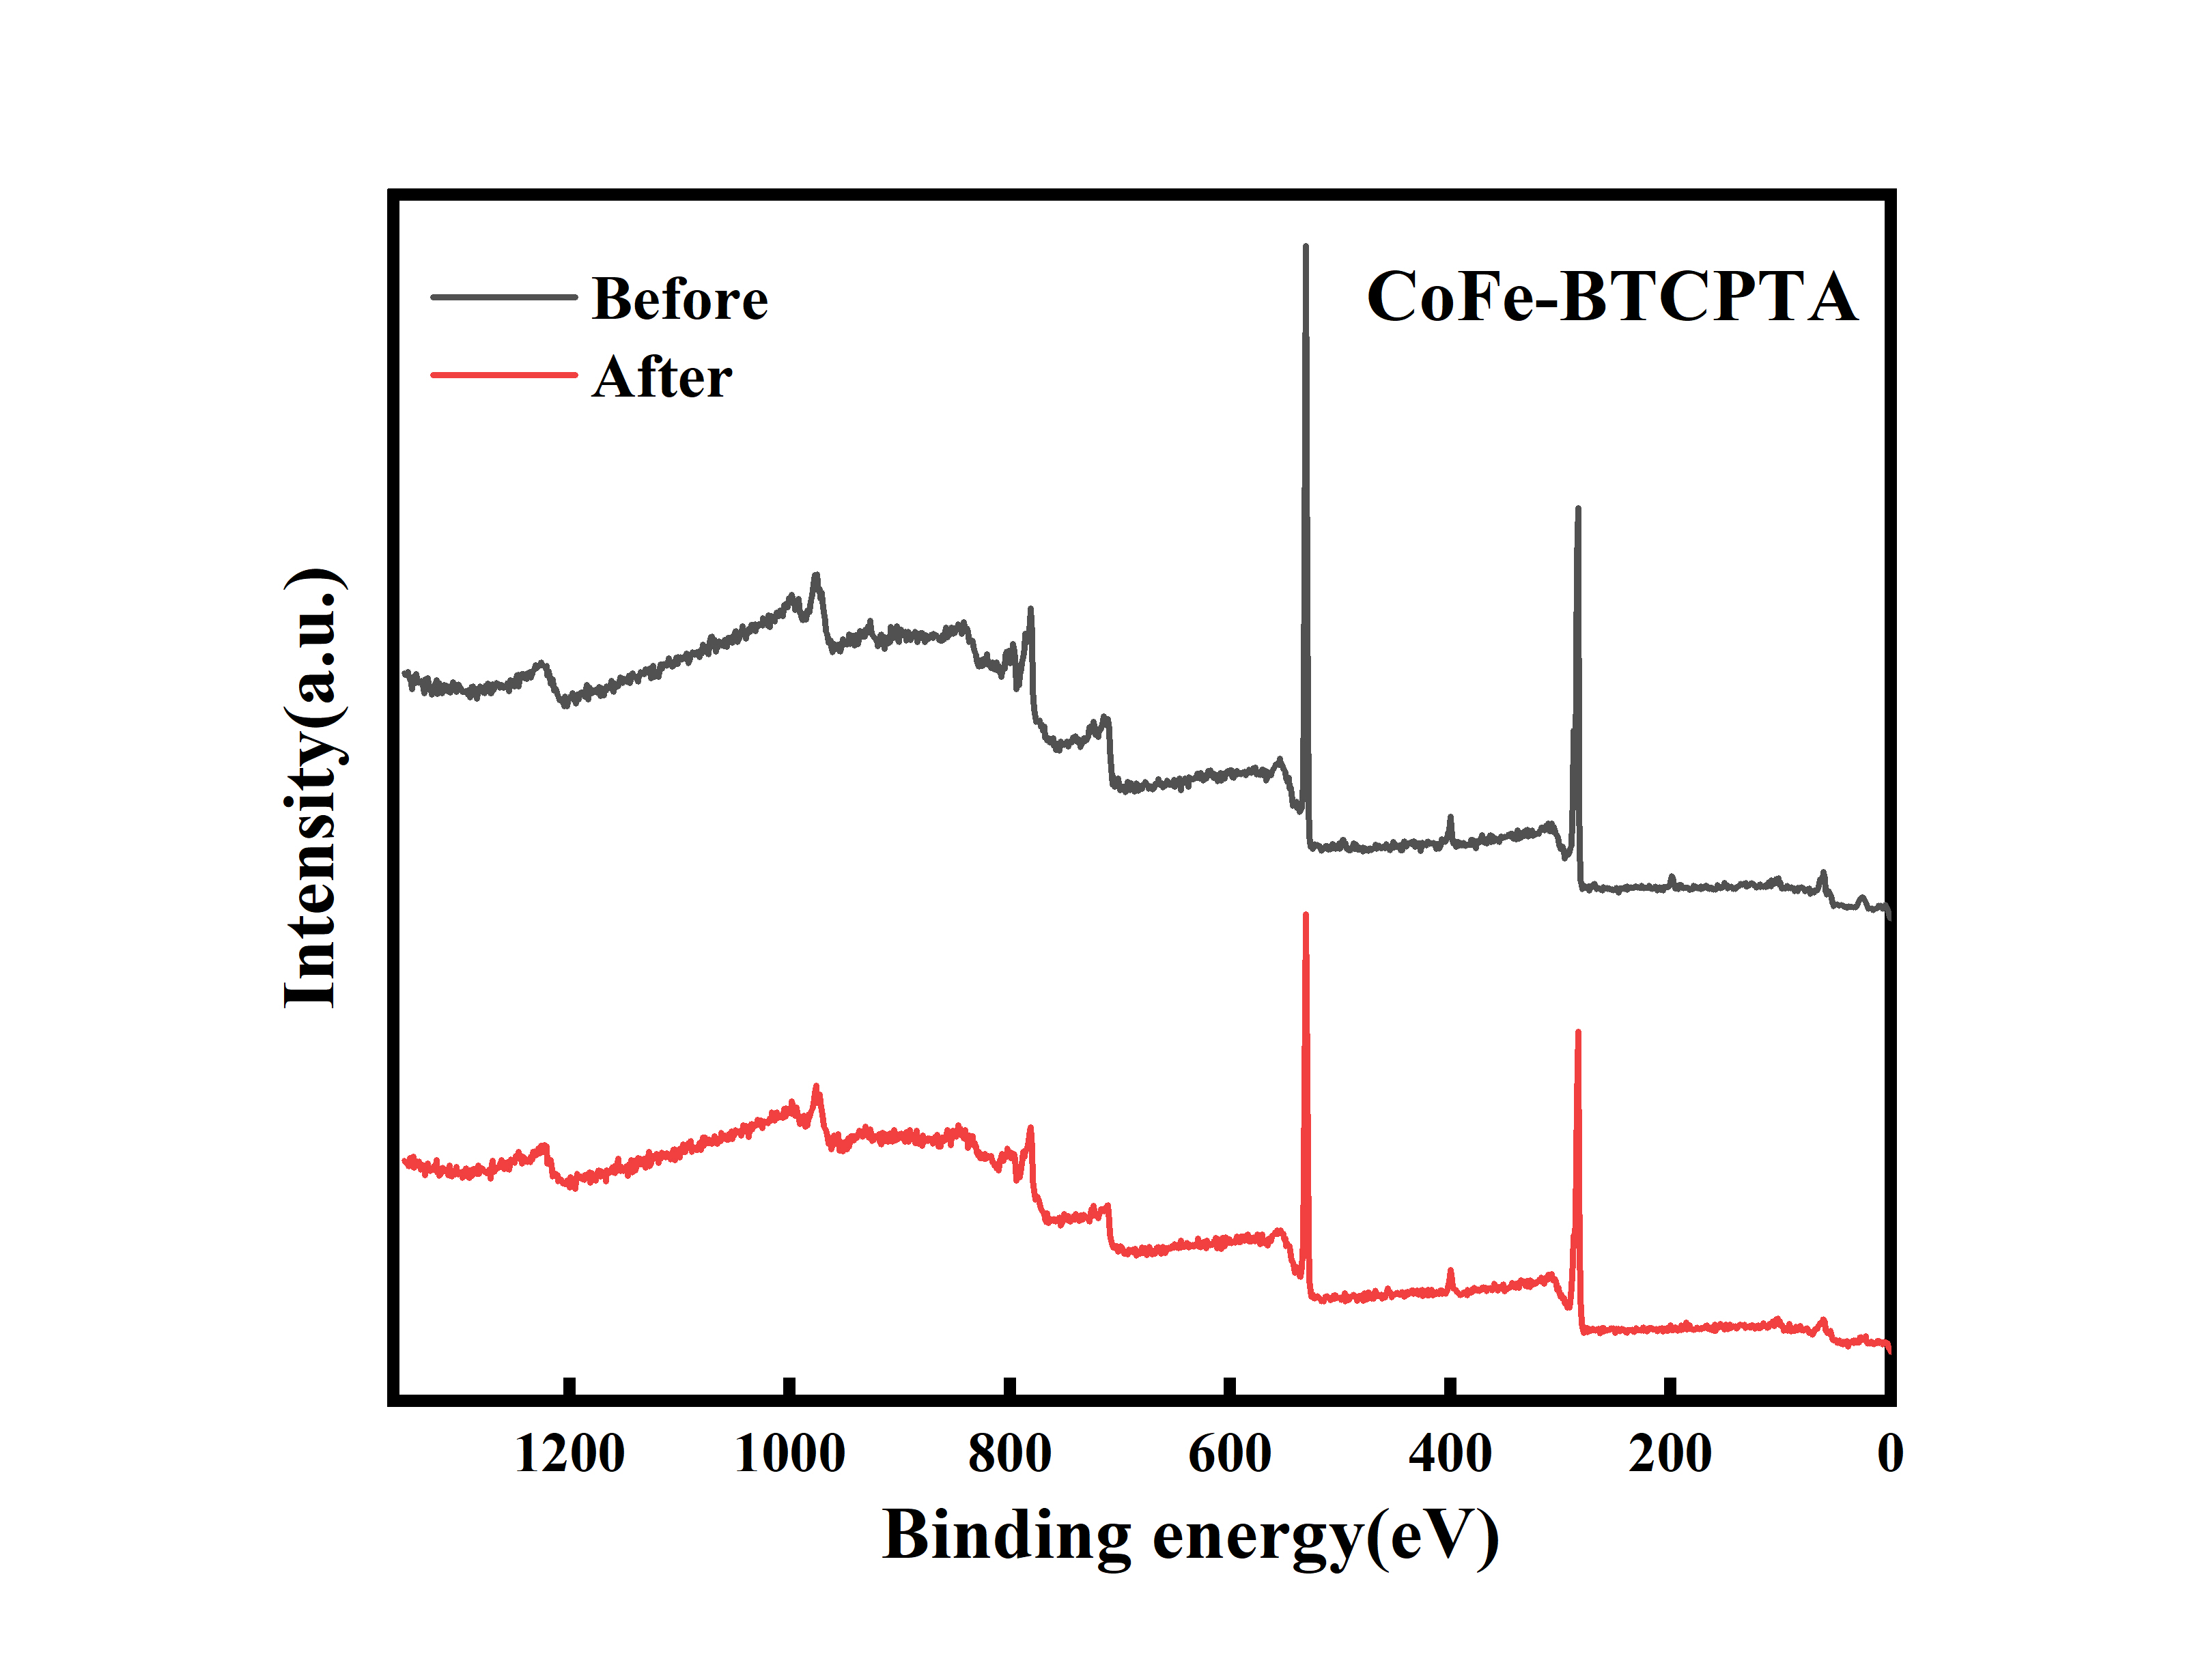


**FIGURE S9** Full scans of XPS spectra for CoFe-BTCPTA nanoclusters before and after electrochemical oxidation.

**
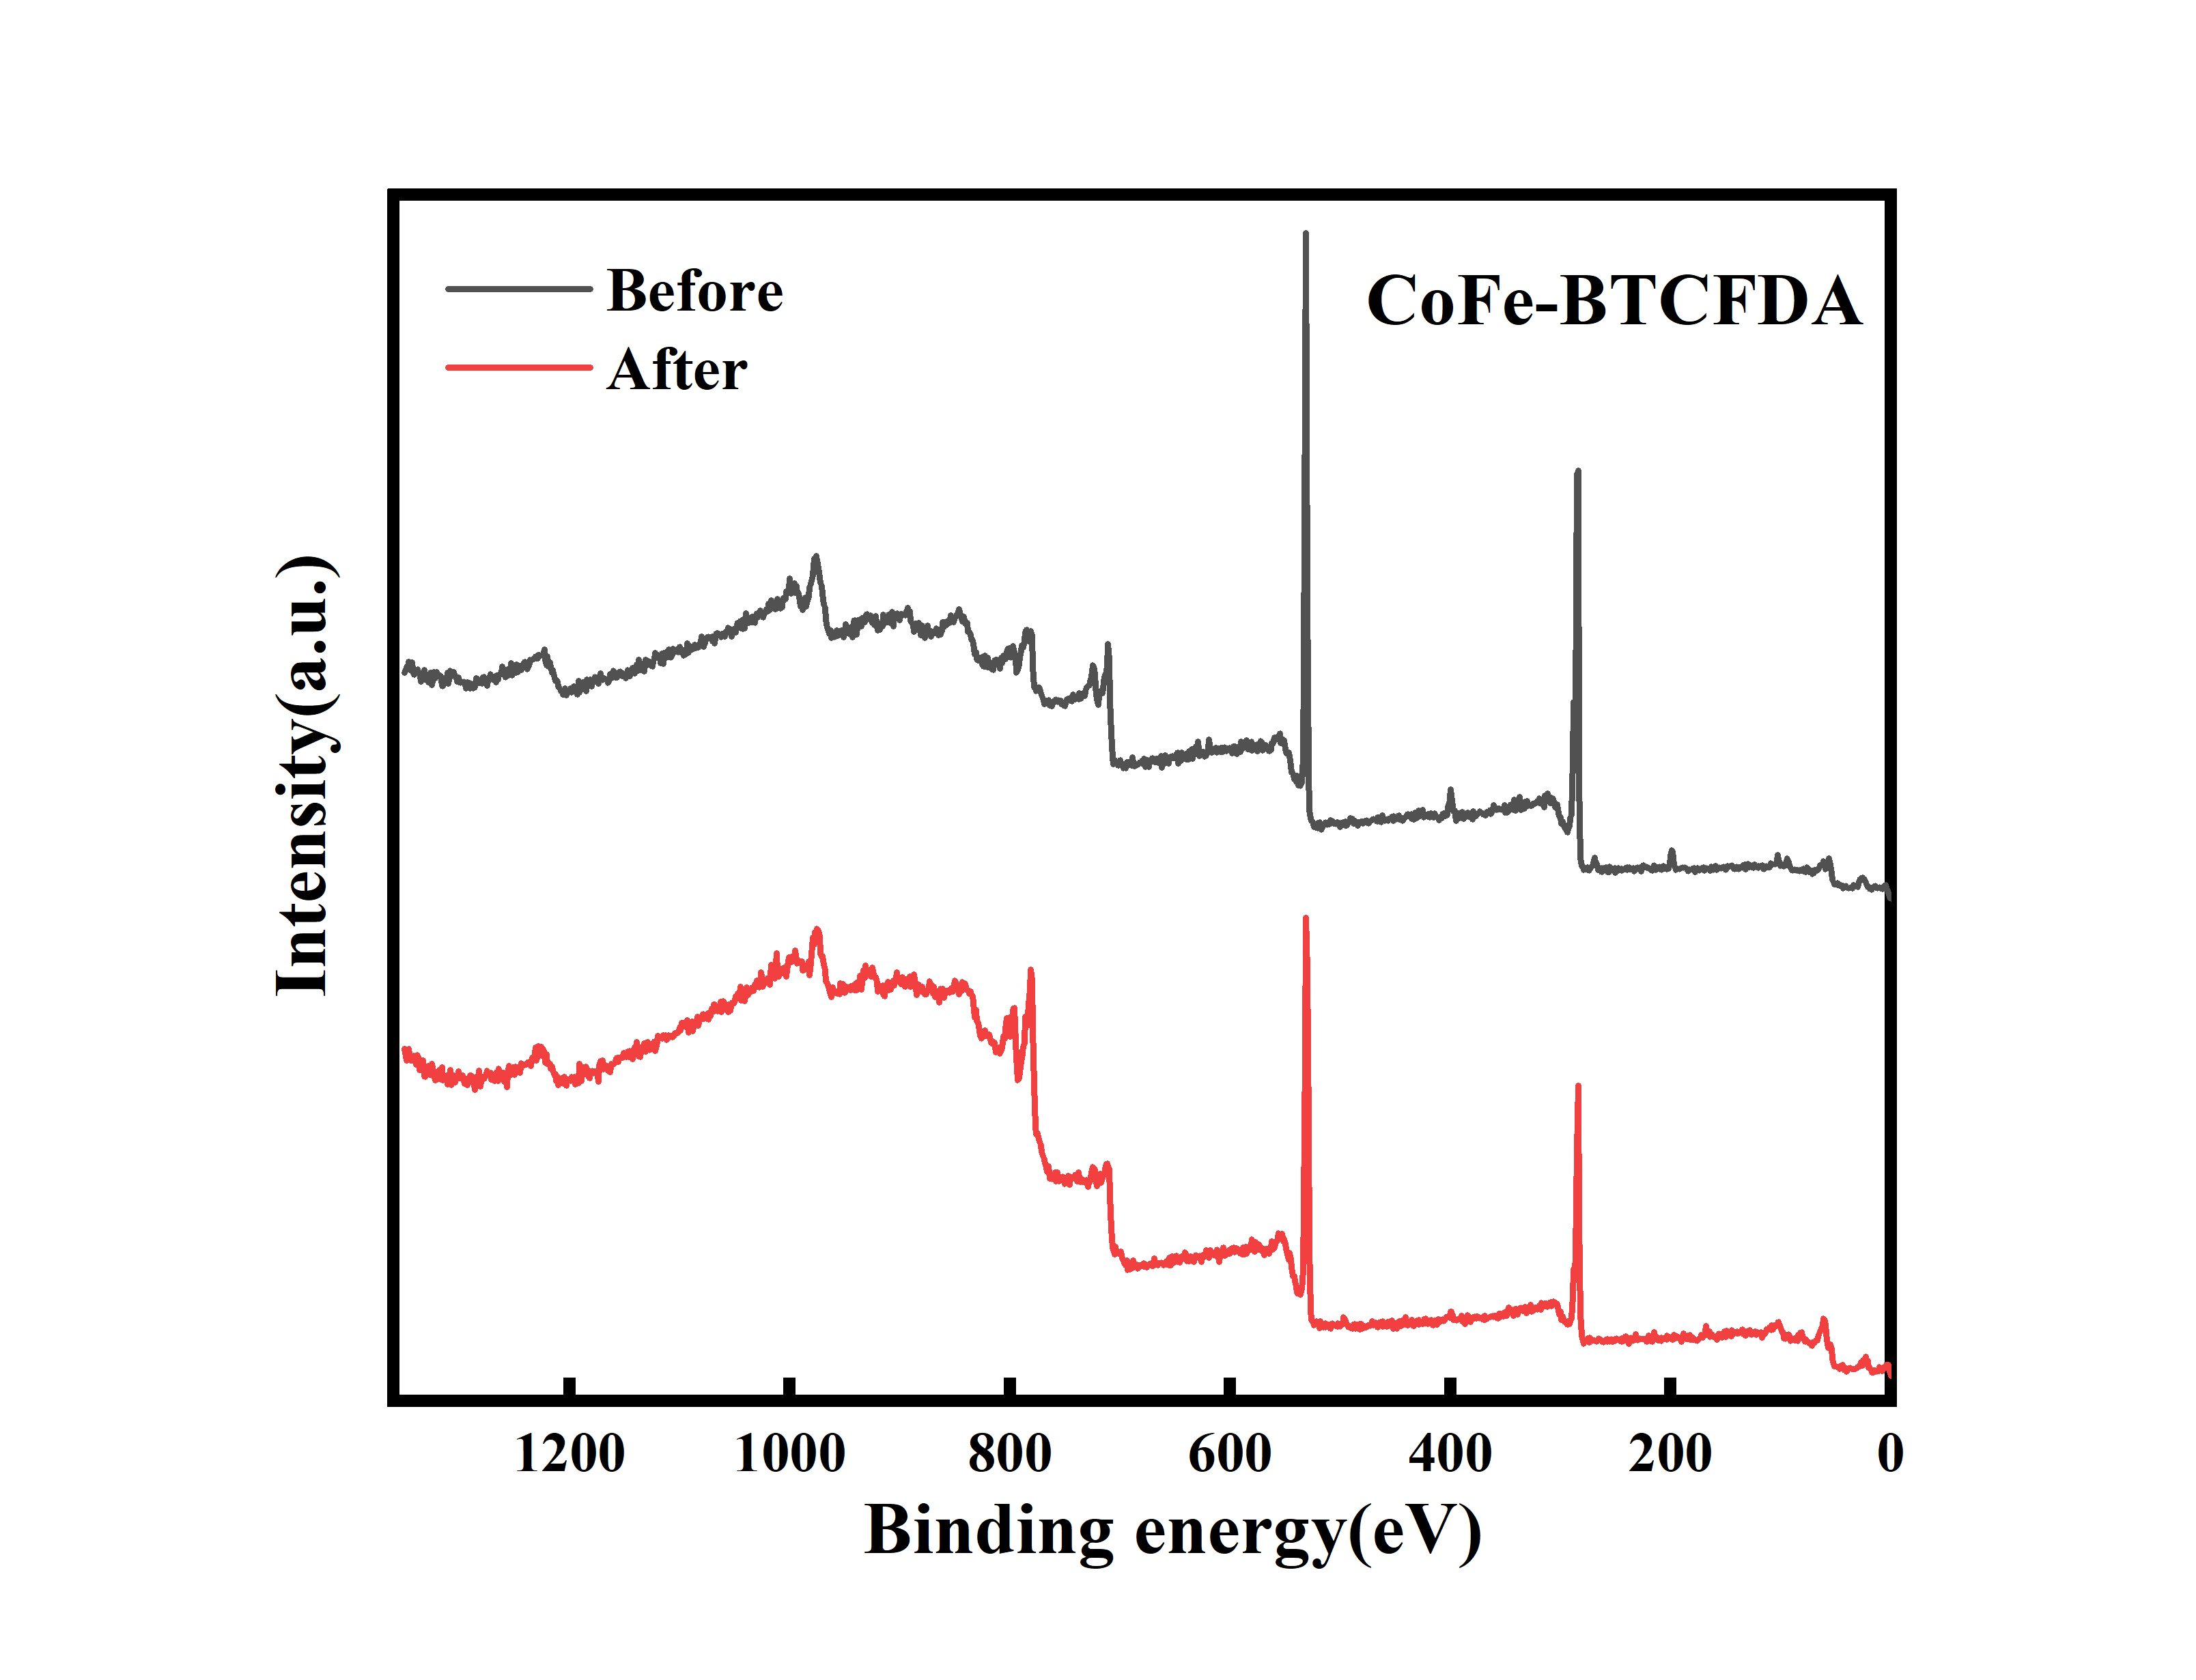
**

**FIGURE S10** Full scans of XPS spectra for CoFe-BTCFDA nanoclusters before and after electrochemical oxidation.

**
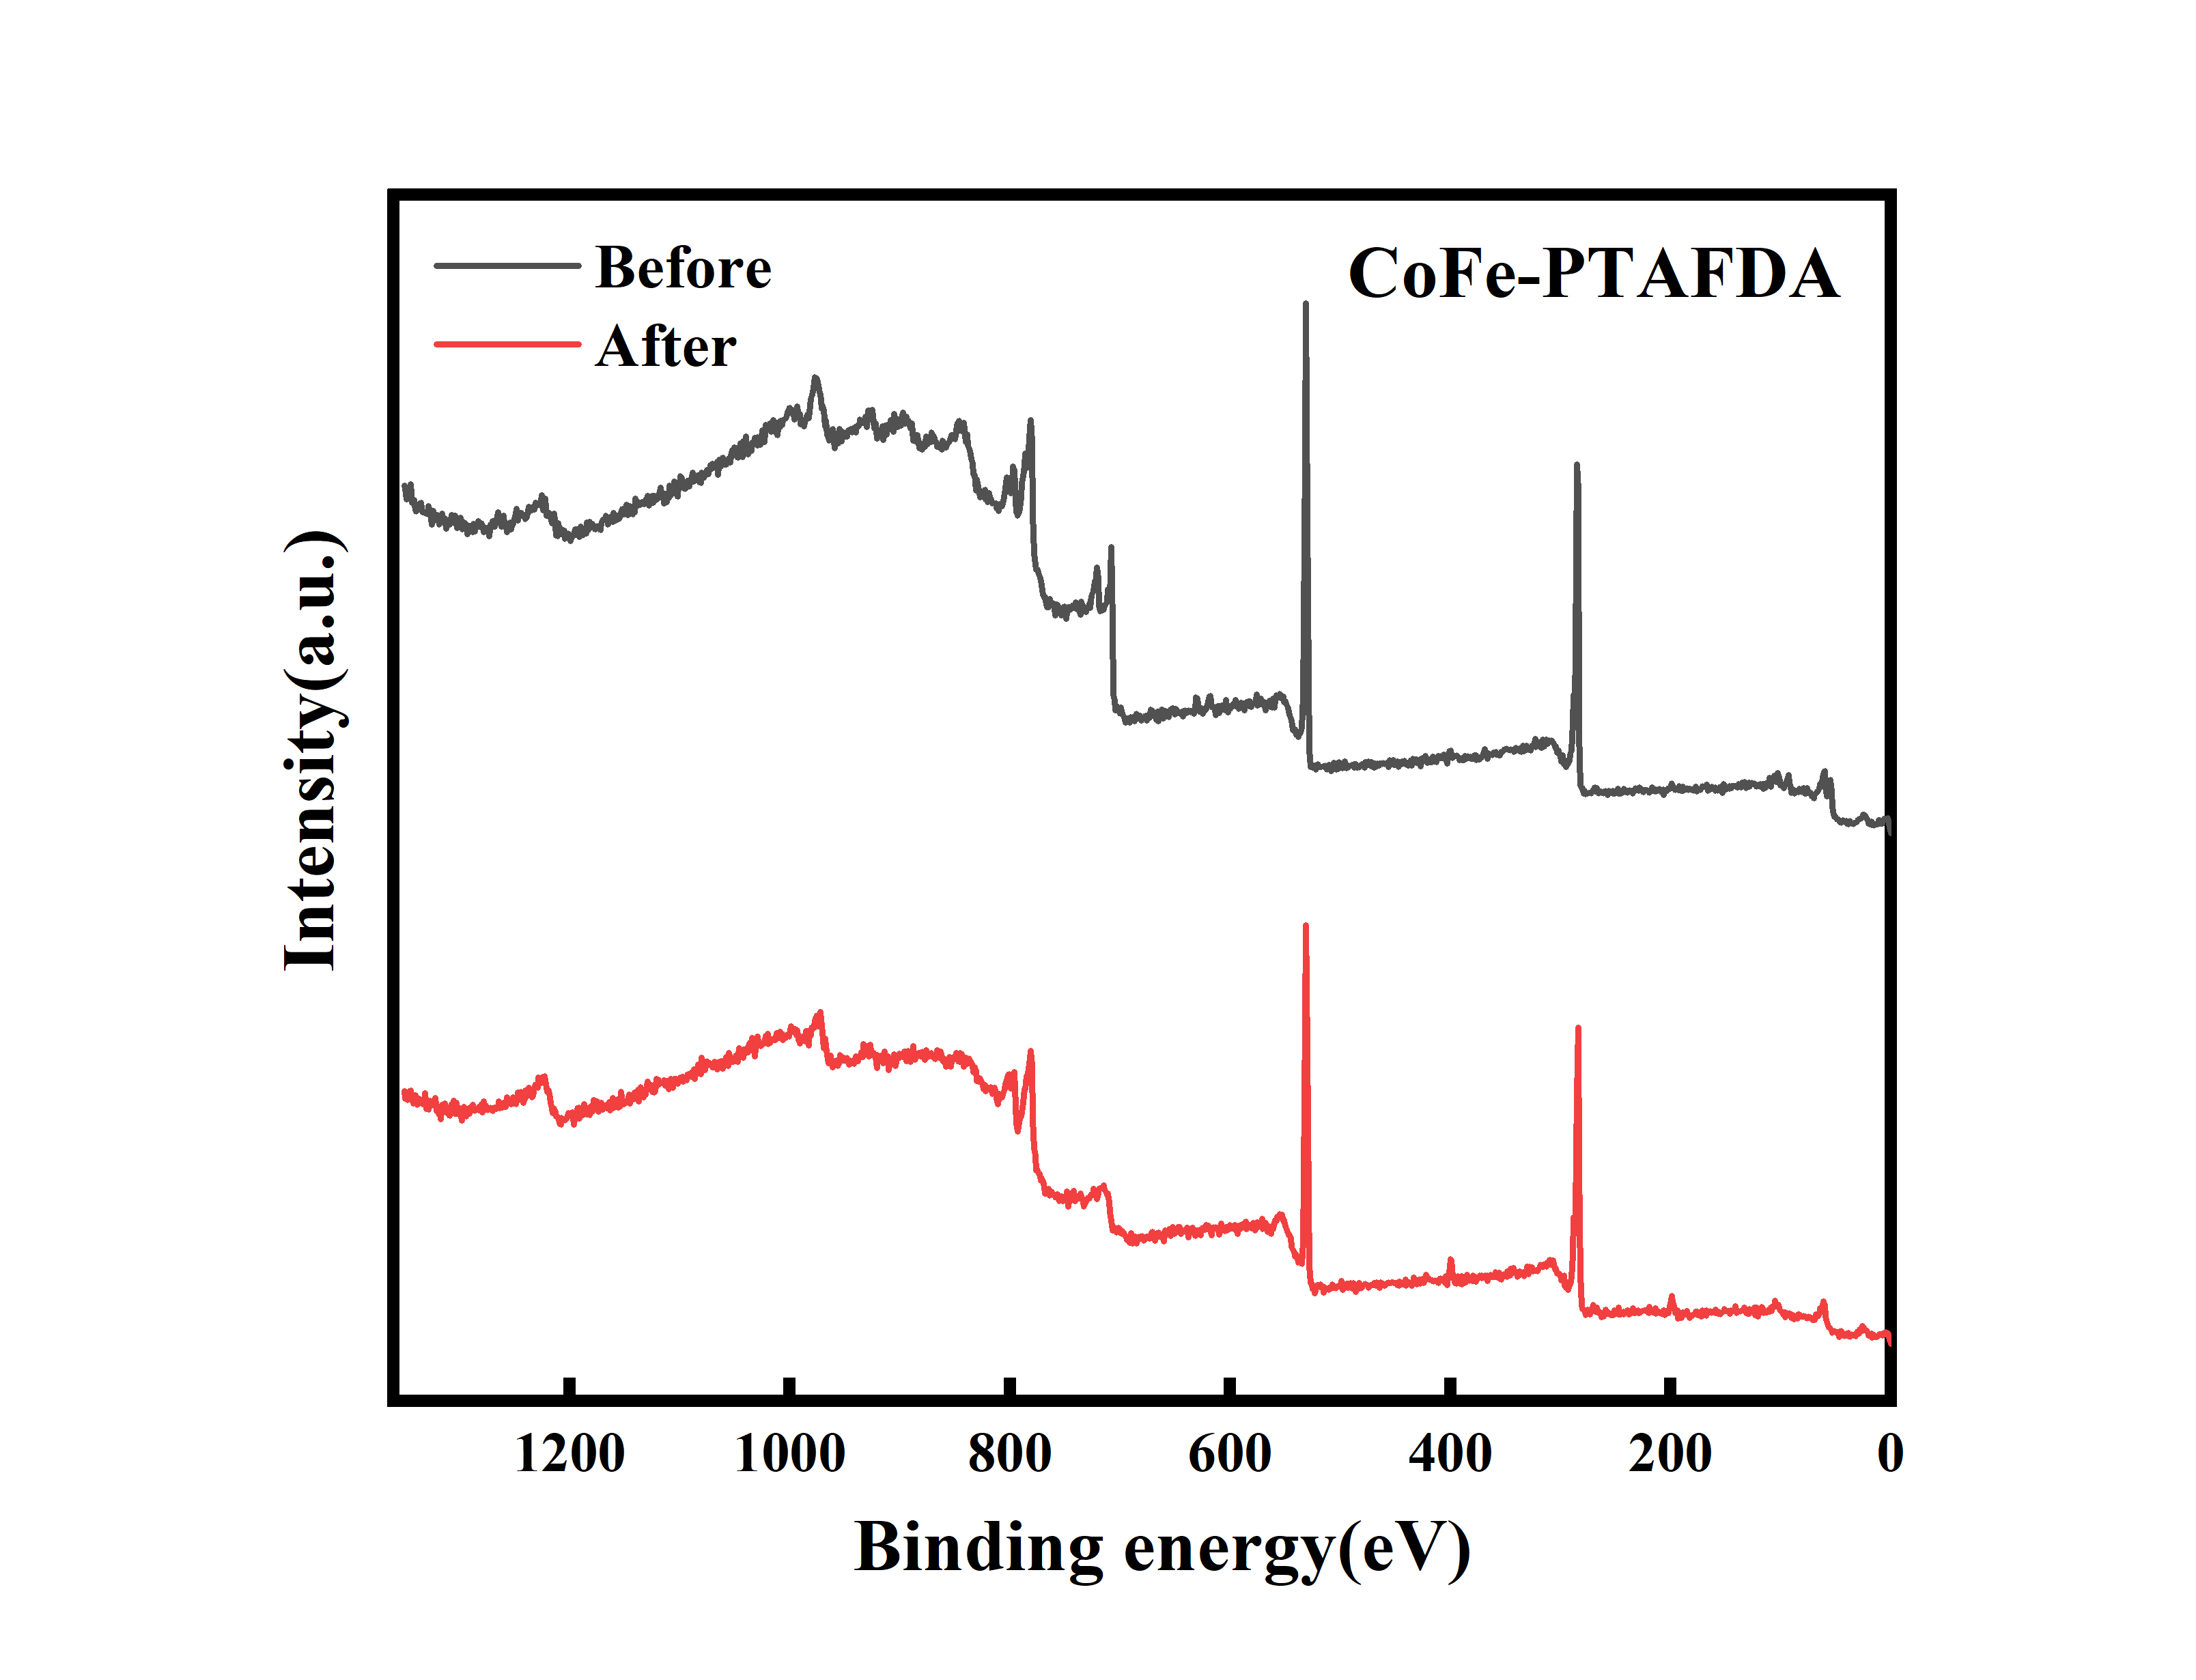
**

**FIGURE S11** Full scans of XPS spectra for CoFe-PTAFDA nanoclusters before and after electrochemical oxidation.


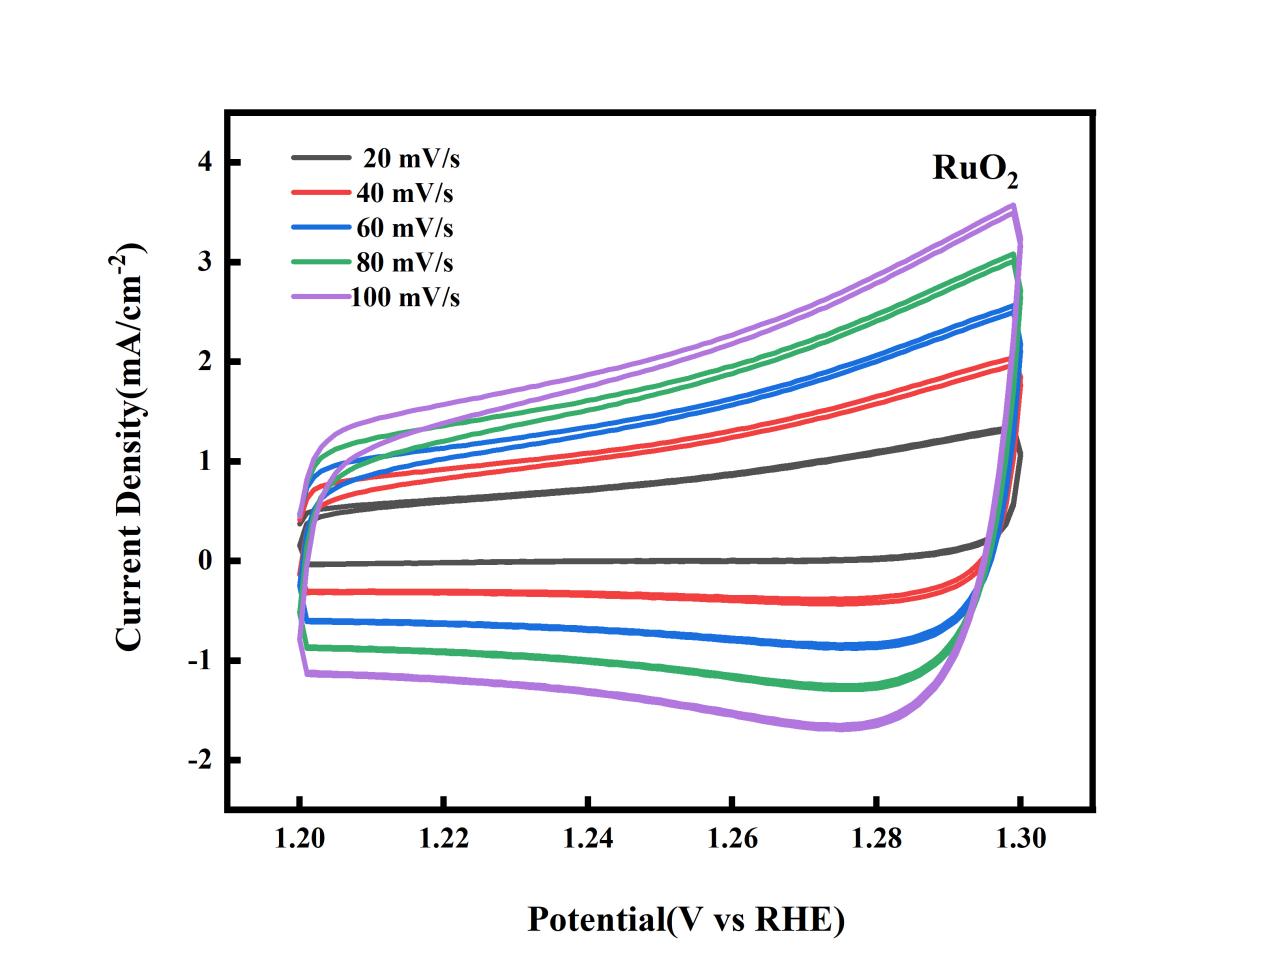


**FIGURE S12** Cdl values of current density differences plotted against scan rates of RuO2.


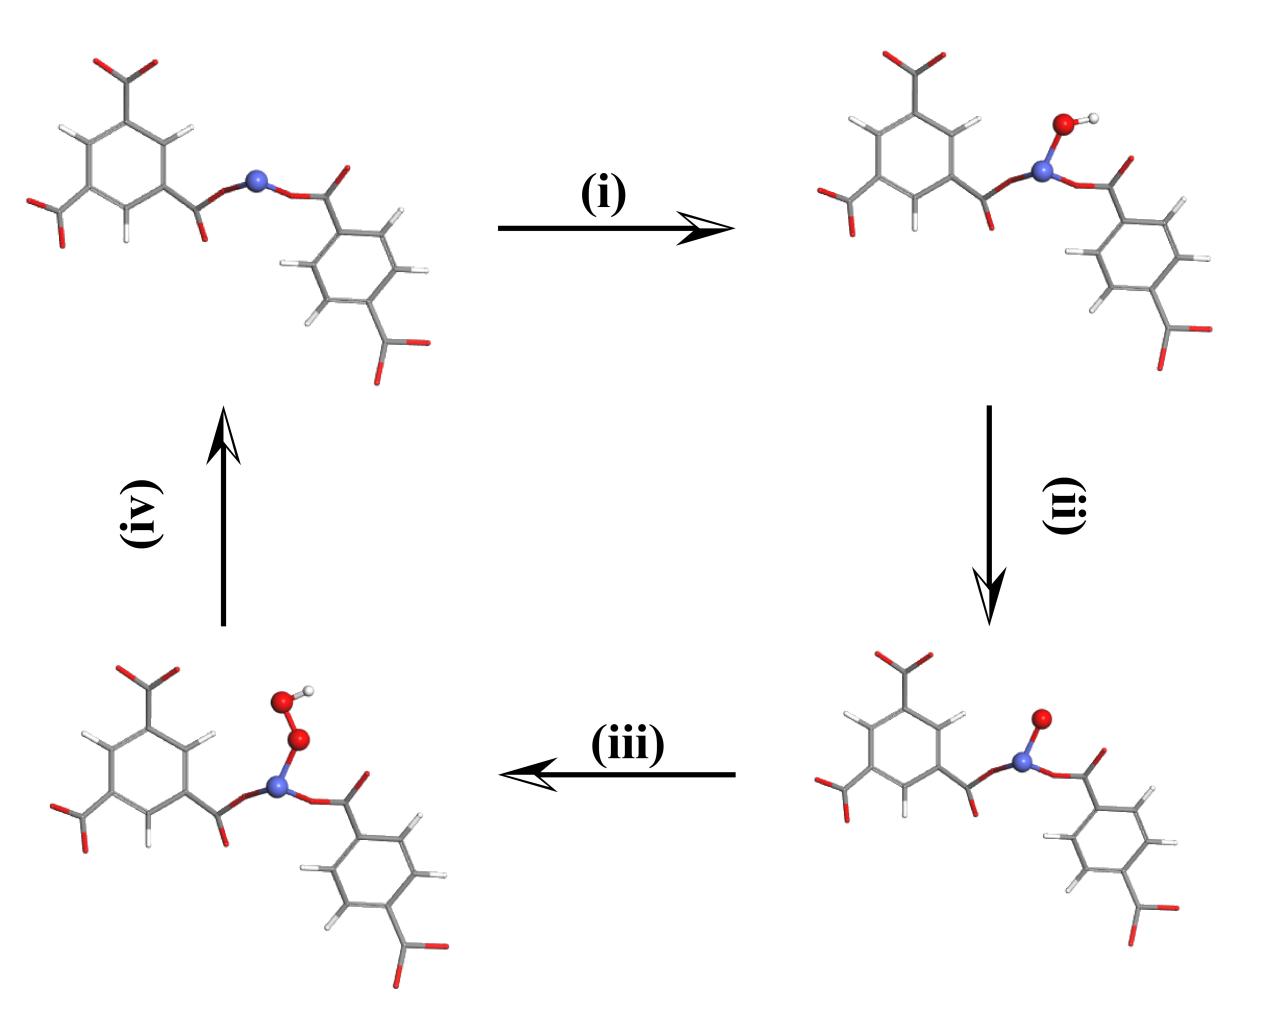


**FIGURE S13** The original procedure of the OER process for CoFe-BTC/PTA. Chemical representation of the color scheme: grey means C atom, red means O atom, white means H atom, blue means Co atom and purple means Fe atom.


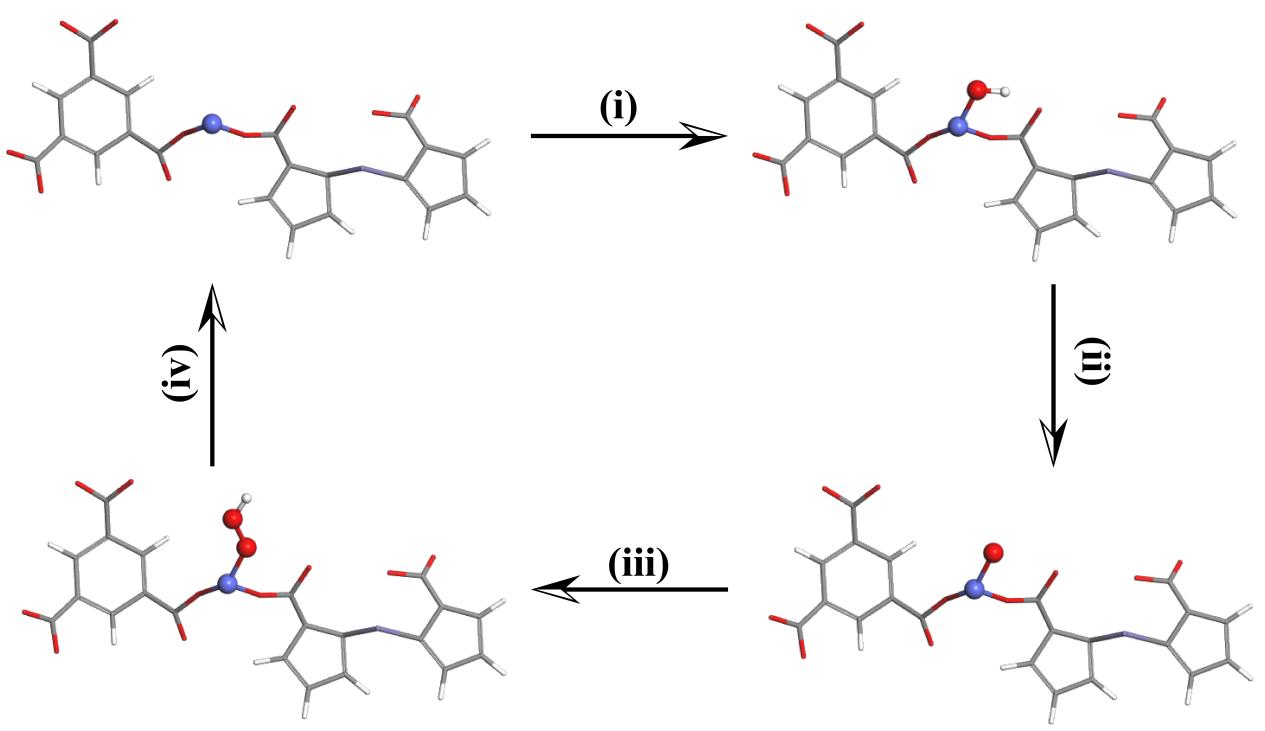


**FIGURE S14** The original procedure of the OER process for CoFe-BTC/FDA. Chemical representation of the color scheme: grey means C atom, red means O atom, white means H atom, blue means Co atom and purple means Fe atom.


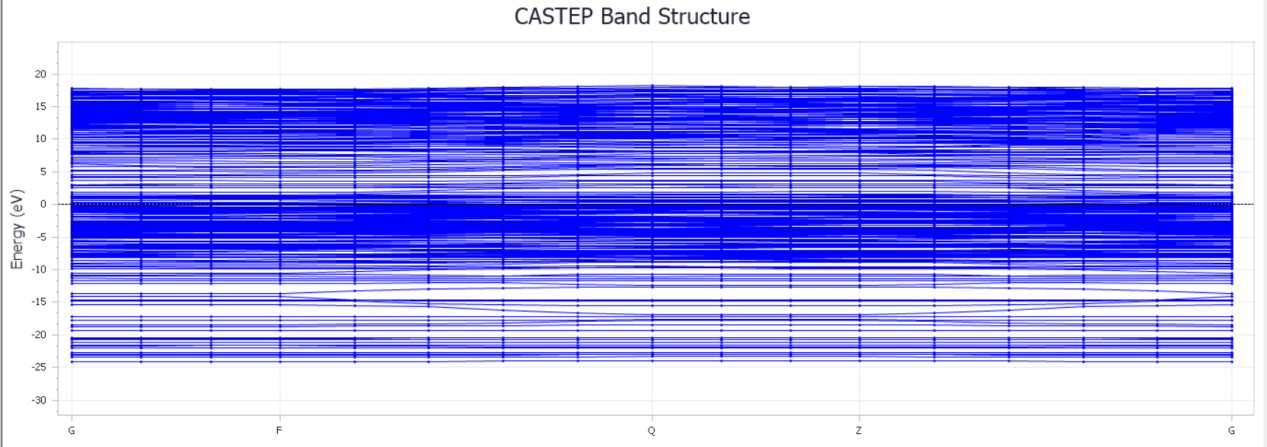


**FIGURE S15** Calculated band structure of CoFe-BTC/PTA.


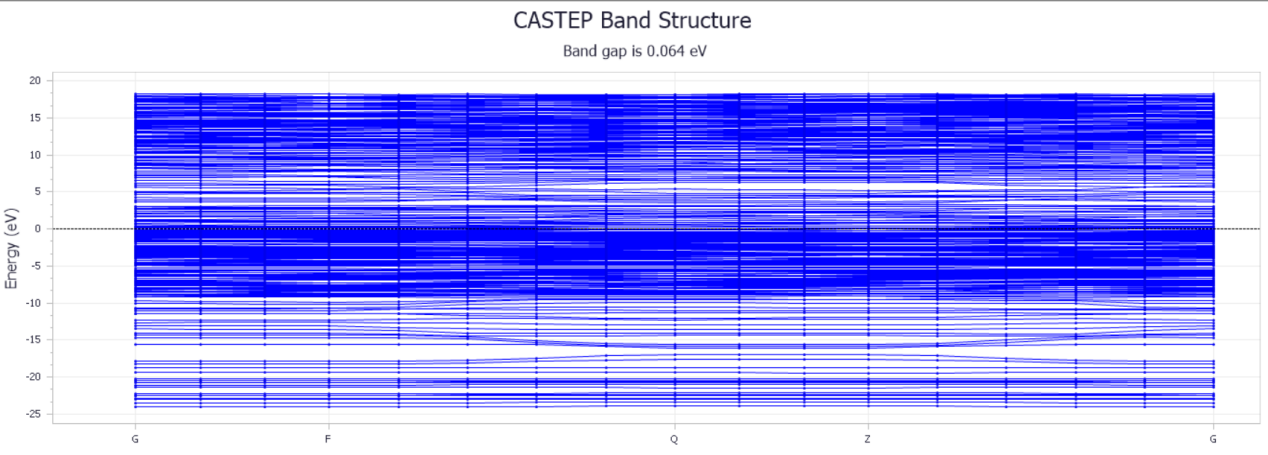


**FIGURE S16** Calculated band structure of CoFe-BTC/FDA.


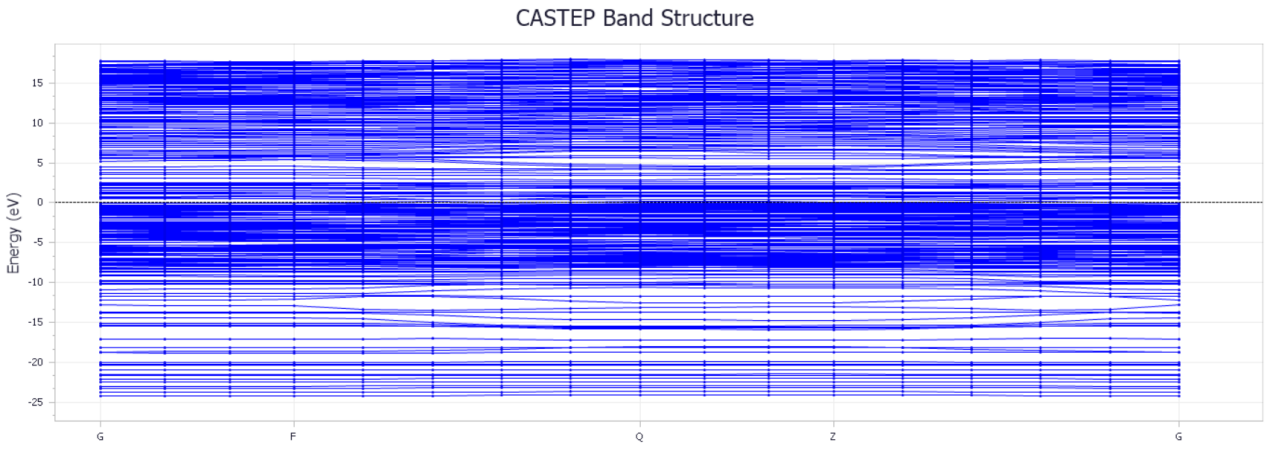


**FIGURE S17** Calculated band structure of CoFe-PTA/FDA.


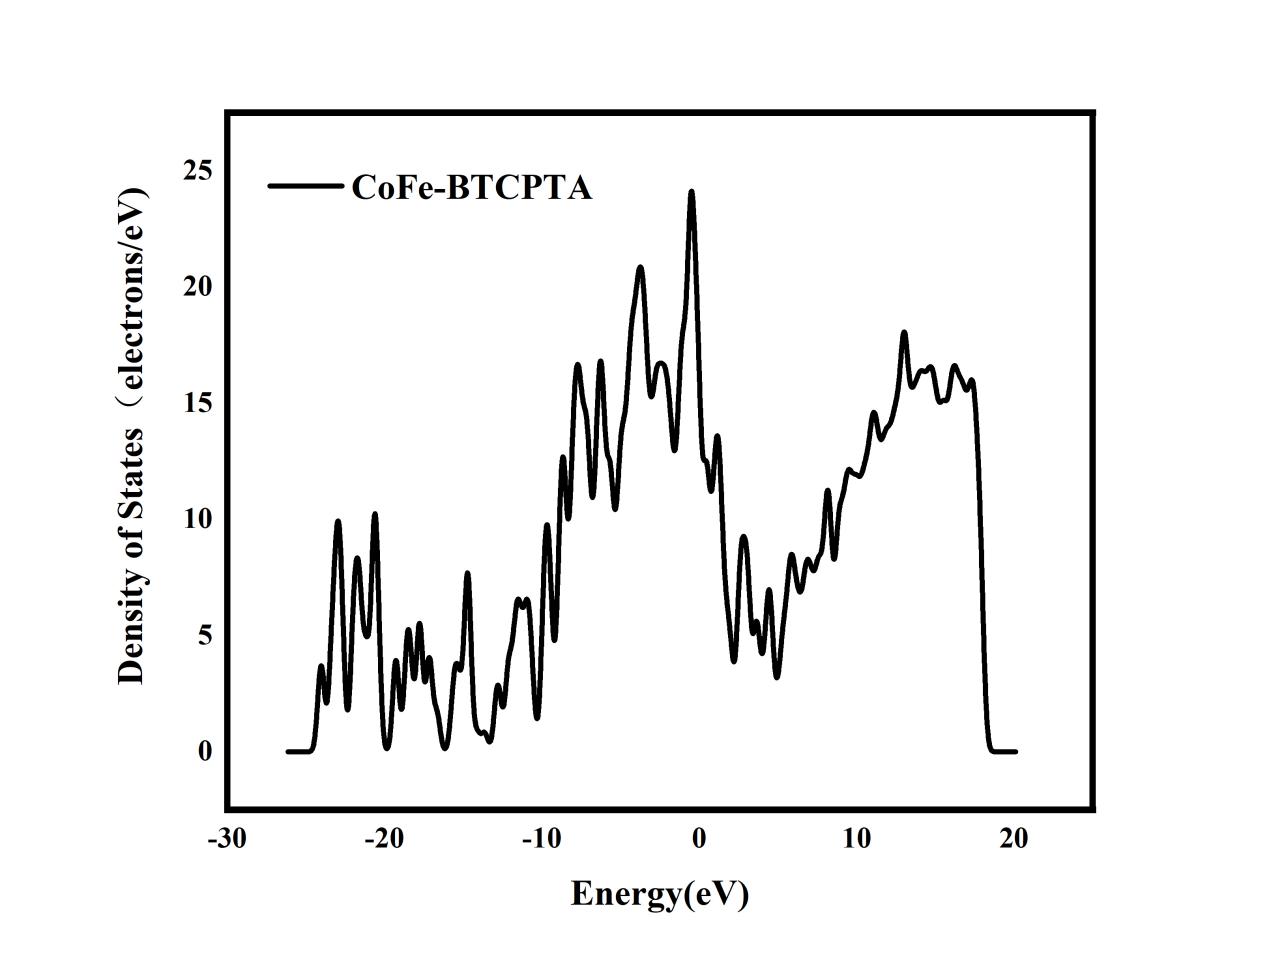


**FIGURE S18** The calculated Full DOS of CoFe-BTC/PTA.


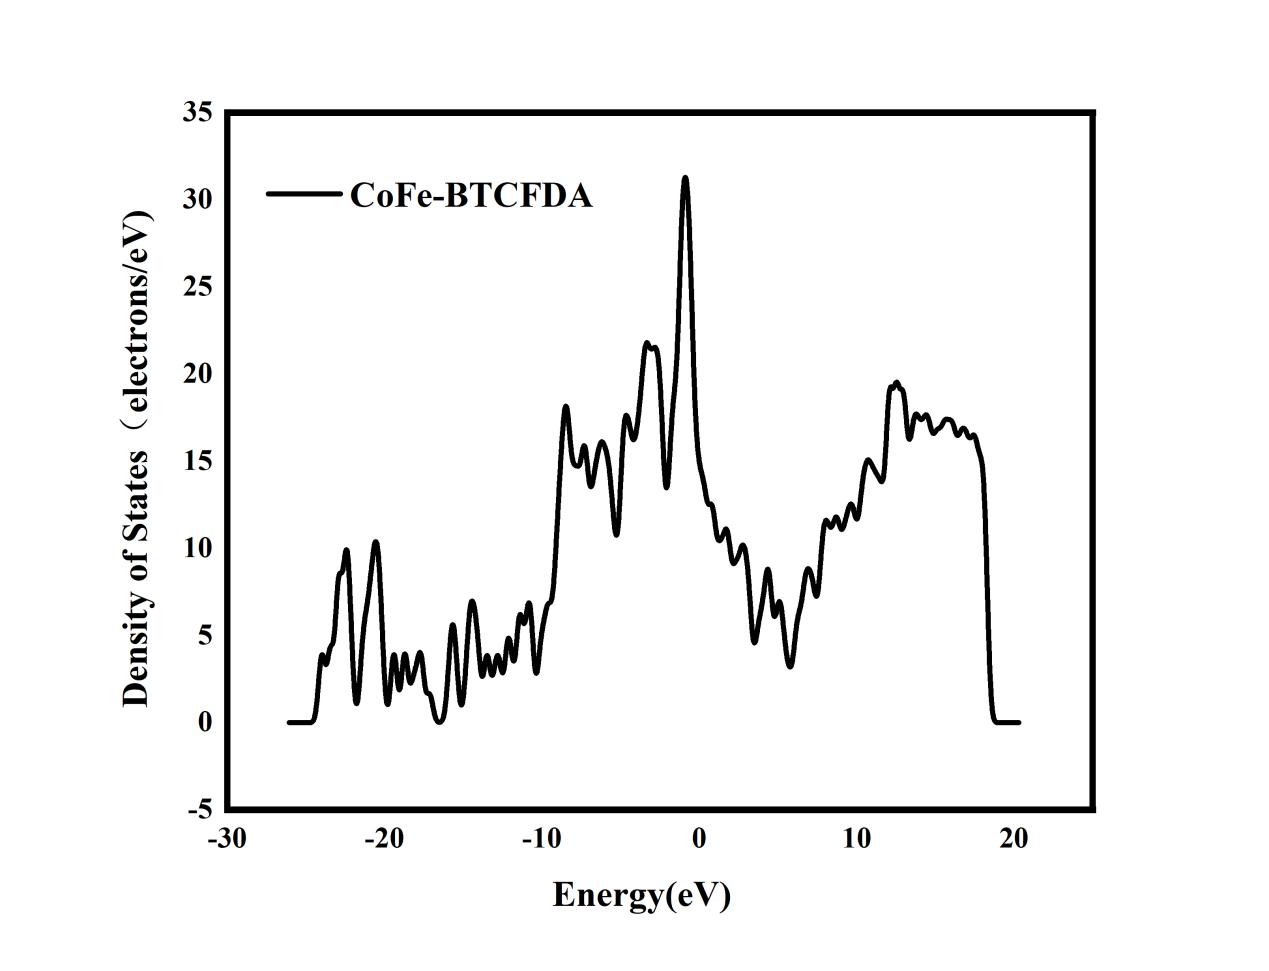


**FIGURE S19** The calculated Full DOS of CoFe-BTC/FDA.


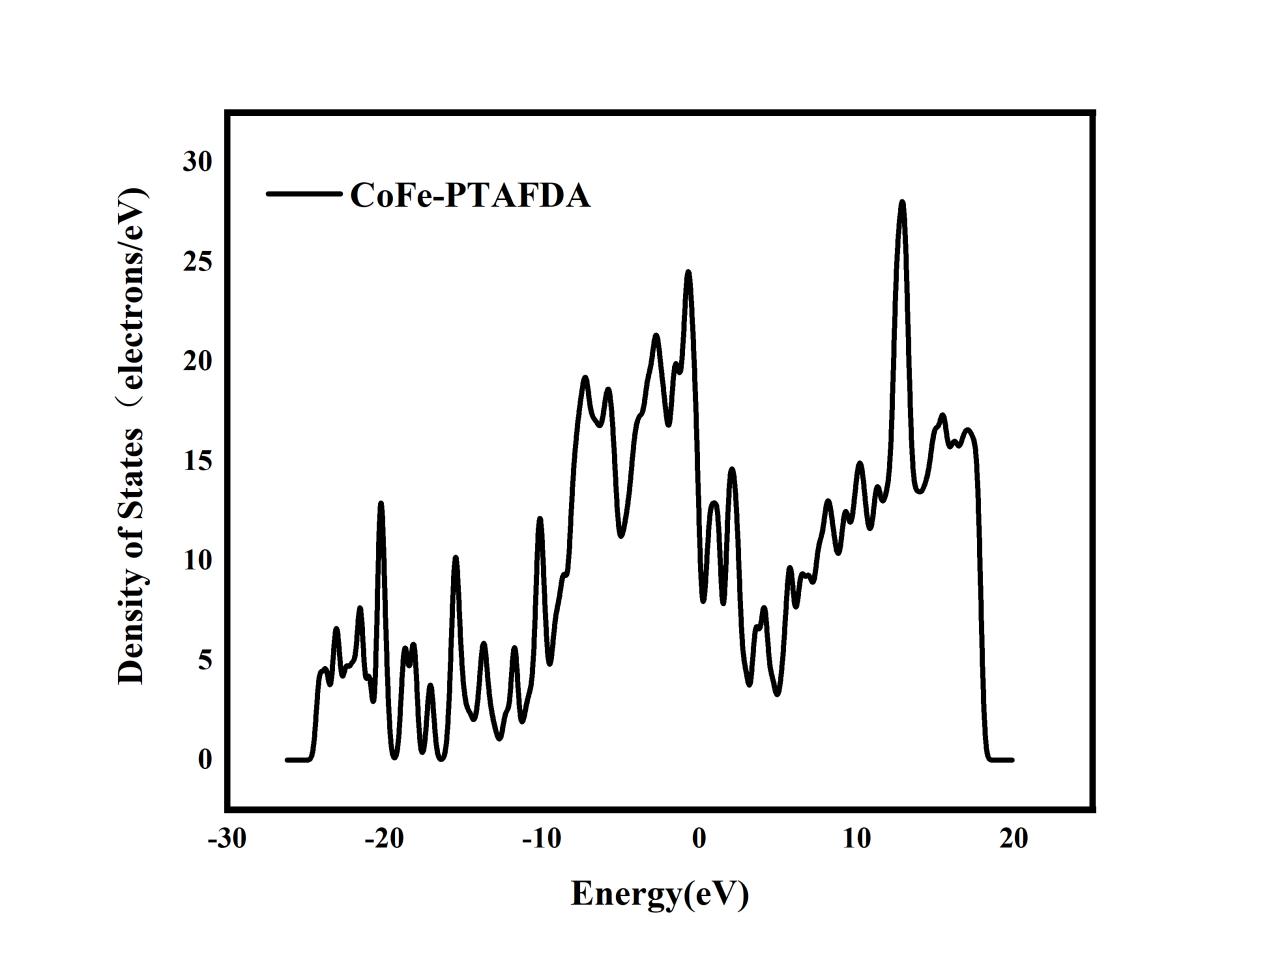


**FIGURE S20** The calculated Full DOS of CoFe-PTA/FDA.

**TABLE S1** Comparison of OER activity for various reported electroncatalysts1-10.

Name Tafel slope/mV dec-1 Overpotential at 10 mA cm-2

CoNi-LDH@PCPs 93.00 320

CoZn-NC-700 69.00 390

CoS2 81.40 386

CoSe2 78.30 339

CoP 100.00 370

Co(S0.71Se0.29)2  67.50 307

MOF-FeCo(1:2) 52.00 238

Fe-MOF 72.00 370

Co0.6Fe0.4MOF-74 56.00 280

Fe 1Co2-P/C 50.00 362

Co3O4/Co-Fe oxide DSNBs 61.00 297

Co-MOF-NS/CC 107.00 330

RuO2 60.11 279

CoFe-BTC/PTA 86.38 322

CoFe-BTC/FDA 75.14 309

CoFe-PTA/FDA 62.85 295

Co-PTA/FDA 65.61 307

**REFERENCE**

1. Chen, B.; He, X.; Yin, F.; Wang, H.; Liu, D.-J.; Shi, R.; Chen, J.; Yin, H., MO-Co@N-Doped Carbon (M = Zn or Co): Vital Roles of Inactive Zn and Highly Efficient Activity toward Oxygen Reduction/Evolution Reactions for Rechargeable Zn-Air Battery. Advanced Functional Materials **2017,** 27 (37). <https://doi.org/10.1002/adfm.201700795>
2. Xiang, W.; Yang, N.; Li, X.; Linnemann, J.; Hagemann, U.; Ruediger, O.; Heidelmann, M.; Falk, T.; Aramini, M.; DeBeer, S.; Muhler, M.; Tschulik, K.; Li, T., 3D atomic-scale imaging of mixed Co-Fe spinel oxide nanoparticles during oxygen evolution reaction. Nat Commun **2022,** 13 (1), 179. https://doi.org/10.1038/s41467-021-27788-2

3. Fang, L.; Li, W.; Guan, Y.; Feng, Y.; Zhang, H.; Wang, S.; Wang, Y., Tuning Unique Peapod-Like Co(SxSe1- x)2 Nanoparticles for Efficient Overall Water Splitting. Advanced Functional Materials **2017,** 27 (24). https://doi.org/10.1002/adfm.201701008

4. Hong, W.; Kitta, M.; Xu, Q., Bimetallic MOF-Derived FeCo-P/C Nanocomposites as Efficient Catalysts for Oxygen Evolution Reaction. Small Methods **2018,** 2 (12), 1800214. https://doi.org/10.1002/smtd.201800214

5. Qiu, B.; Cai, L.; Wang, Y.; Lin, Z.; Zuo, Y.; Wang, M.; Chai, Y., Fabrication of Nickel-Cobalt Bimetal Phosphide Nanocages for Enhanced Oxygen Evolution Catalysis. Advanced Functional Materials **2018,** 28 (17). https://doi.org/10.1002/adfm.201706008

6. Wang, W.; Lu, Y.; Zhao, M.; Luo, R.; Yang, Y.; Peng, T.; Yan, H.; Liu, X.; Luo, Y., Controllable Tuning of Cobalt Nickel-Layered Double Hydroxide Arrays as Multifunctional Electrodes for Flexible Supercapattery Device and Oxygen Evolution Reaction. ACS Nano **2019,** 13 (10), 12206-12218. https://doi.org/10.1021/acsnano.9b06910

7. Wang, X.; Yu, L.; Guan, B. Y.; Song, S.; Lou, X. W., Metal–Organic Framework Hybrid-Assisted Formation of Co3O4/Co-Fe Oxide Double-Shelled Nanoboxes for Enhanced Oxygen Evolution. Advanced Materials **2018,** 30 (29), 1801211. https://doi.org/10.1002/adma.201801211

8. Wei, Z.; Zhu, W.; Li, Y.; Ma, Y.; Wang, J.; Hu, N.; Suo, Y.; Wang, J., Conductive Leaflike Cobalt Metal–Organic Framework Nanoarray on Carbon Cloth as a Flexible and Versatile Anode toward Both Electrocatalytic Glucose and Water Oxidation. Inorganic Chemistry **2018,** 57 (14), 8422-8428.

https://doi.org/10.1021/acs.inorgchem.8b01106

9. Zhang, X.; Liu, Q.; Shi, X.; Asiri, A. M.; Sun, X., An Fe-MOF nanosheet array with superior activity towards the alkaline oxygen evolution reaction. Inorganic Chemistry Frontiers **2018,** 5 (6), 1405-1408. https://doi.org/10.1039/C8QI00163D

10. Zhao, X.; Pattengale, B.; Fan, D.; Zou, Z.; Zhao, Y.; Du, J.; Huang, J.; Xu, C., Mixed-Node Metal–Organic Frameworks as Efficient Electrocatalysts for Oxygen Evolution Reaction. ACS Energy Letters **2018,** 3 (10), 2520-2526. https://doi.org/10.1021/acsenergylett.8b01540
